# Inference of coevolutionary dynamics and parameters from host and parasite polymorphism data of repeated experiments

Hanna Märkle<sup>a,\*</sup>, Aurélien Tellier<sup>a</sup>

<sup>a</sup>*Section of Population Genetics, TUM School of Life Sciences Weihenstephan, Technical University of Munich, Liesel-Beckmann-Str. 2, 85354 Freising, Germany*

---

## Abstract

There is a long-standing interest in understanding host-parasite coevolutionary dynamics and associated fitness effects. Increasing amounts of genomic data offer new ways to understand the past coevolutionary history. To extract such information, it is crucial to understand the link between allele frequency dynamics and polymorphism data. We couple coevolutionary models, which include costs of resistance, infectivity and infection, with coalescent simulations to generate polymorphism data at the involved loci. We show that under trench-warfare dynamics the allele frequencies at the internal equilibrium point determine the strength of the resulting balancing selection signatures.

As a proof-of-principle, we then apply an Approximate Bayesian Computation approach to infer the cost values using host and parasite polymorphism data from repeated experiments. First, we demonstrate that the cost of infection and host and parasite population sizes can be inferred knowing the costs of resistance and infectivity. Second, we can infer simultaneously all three costs when population

---

\*Corresponding author  
*Email addresses:* [hanna.maerkle@tum.de](mailto:hanna.maerkle@tum.de) (Hanna Märkle), [tellier@wzw.tum.de](mailto:tellier@wzw.tum.de) (Aurélien Tellier)

sizes are known. Third, the polymorphism data in the host are informative about the cost of infectivity (parasite cost), while the signatures in the parasite inform about the cost of resistance and infection (host costs). We discuss the implications of our results for genomic based inference of host-parasite coevolution.

8 **Keywords:** Host-parasite coevolution, polymorphism data, ABC, fitness cost

---

## 9 **1. Introduction**

10 Host-parasite coevolution is an ubiquitous process and has been demonstrated in  
 11 terrestrial (Thrall et al., 2012), limnological (Decaestecker et al., 2007) and marine  
 12 environments (Martiny et al., 2014). It describes the process of parasites and hosts  
 13 exerting reciprocal selective pressures on one another. A necessary condition for  
 14 coevolution to take place is some underlying heritable variation for the traits being  
 15 involved into the coevolutionary interaction, such as resistance or infectivity. Irre-  
 16 spectively of the underlying genomic architecture, coevolution and the associated  
 17 reciprocal selective pressures result in allele frequency changes at the underlying  
 18 genes. One central question in host-parasite coevolution is how allele frequen-  
 19 cies change over time (directional changes, regular fluctuations, chaotic fluctua-  
 20 tions) and the resulting short and long-term patterns of allelic polymorphism (tran-  
 21 sient or stable polymorphism). Allele frequency dynamics are usually classified  
 22 based on a continuum ranging from arms-race dynamics on the one extreme and  
 23 trench-warfare dynamics on the other extreme (Brown and Tellier, 2011; Wool-  
 24 house et al., 2002). In arms race dynamics frequencies of new beneficial alleles  
 25 (such as new resistance alleles, infectivity alleles) arising by *de novo* mutations  
 26 increase towards fixation in both interacting partners. Accordingly, alleles are re-

27 currently replaced and thus, are short lived and polymorphism is only transient.  
 28 Such dynamics have been e.g. demonstrated in the initial phase of *Pseudomonas*  
 29 *fluorescens* coevolving with a phage (Hall et al., 2011). Opposed to arms-race are  
 30 trench-warfare dynamics (Stahl et al., 1999; Woolhouse et al., 2002), where sev-  
 31 eral alleles segregate simultaneously and are stably maintained in the host and the  
 32 parasite. Here, allele frequencies either converge towards a stable equilibrium or  
 33 they fluctuate persistently over time, both dynamics resulting in long-term main-  
 34 tenance of allelic polymorphism.

35 The type of occurring dynamics depends on the type and strength of various forms  
 36 of selection (negative indirect frequency dependent selection, negative direct fre-  
 37 quency dependent selection, overdominant selection) and their interplay with ge-  
 38 netic drift. In frequency dependent selection the strength of selection depends  
 39 on the frequency of particular alleles. Negative indirect frequency dependent se-  
 40 lection (niFDS) takes place when the fitness of a particular host alleles increases  
 41 with decreasing frequencies of a particular allele in the parasite and vice-versa  
 42 (Seeger, 1988; Tellier and Brown, 2007). When the fitness of a host or parasite  
 43 allele decreases with its own frequency negative direct frequency-dependent se-  
 44 lection (ndFDS) is acting. ndFDS can be promoted by factors such as asynchrony  
 45 between host and parasite life-cycles (overlapping parasite generations, several  
 46 parasite generation per host generation) or epidemiological feedback due to den-  
 47 sity dependent disease transmission (Brown and Tellier, 2011). Overdominant  
 48 selection or some form of ndFDS are a necessary but not sufficient condition for  
 49 trench-warfare dynamics to take place in single locus host-parasite coevolutionary  
 50 interactions (Tellier and Brown, 2007). Even with some form of ndFDS acting,  
 51 arms-race dynamics can take place if either the strength of ndFDS compared to

niFDS is weak or genetic drift is causing random loss of alleles.

The exact nature of the dynamics, such as the equilibrium frequencies of alleles and the period and amplitude of coevolutionary cycles, is further affected by the way host and parasite genotypes interact at the molecular level and the fitness costs associated with the coevolutionary interaction. The interaction at the molecular level is captured by the infection matrix which stores the level of infection in all possible pairwise interactions between host and parasite genotypes. One well studied type of interaction is the gene-for-gene (GFG) interaction which presents one endpoint of a continuum of infection matrices (Agrawal and Lively, 2002). GFG-interactions are characterized by one universally infective parasite genotype and one universally susceptible host type. Such interactions have been found for example in the Flax-*Melampsora lini* system (Flor, 1971).

A fitness cost which has been shown to crucially affect the coevolutionary dynamics is the loss in fitness due to infection (Tellier and Brown, 2007; Tellier et al., 2014). In addition, costs of resistance such as reduced competitive ability or fertility in absence of the parasite (Kraaijeveld and Godfray, 1997; Bergelson and Purrington, 1996; Lenski, 1988) and costs of infectivity such as reduced spore production of infective pathogens (Thrall and Burdon, 2003) can further alter the dynamics. These costs also determine the equilibrium frequencies of the coevolutionary system (Leonard, 1994; Frank, 1992).

Understanding the link between allele frequency dynamics at the coevolving loci under the joint influence of coevolution and genetic drift and the resulting genomic signatures at linked neutral sites is important for the application and development of inference methods. The classic expectation is that arms-race dynamics result in selective sweep signatures which are characterized by lower genetic diversity

at neutral sites being linked to the coevolving locus compared to the genome-wide average and increased levels in linkage disequilibrium (Maynard Smith and Haigh, 1974). Trench-warfare dynamics on the other hand are expected to result in signatures of balancing selection being characterized by higher than average diversity due to the maintenance of several alleles for a long period of time (Charlesworth et al., 1997). However, trench-warfare dynamics do not necessarily result in observable genomic signatures in both interacting partners (Tellier et al., 2014).

Therefore, we aim to investigate explicitly the link between expected dynamics in infinite population size and the resulting signatures around the coevolving loci in the host and the parasite. We can show that the resulting coevolutionary signatures in both interacting partners change with the equilibrium frequencies of alleles.

Accordingly, as a proof-of principle, we aim to infer information about key parameters from polymorphism data at the host and parasite coevolving loci. Therefore, we apply Approximate Bayesian Computation (Csillery et al., 2010; Beaumont et al., 2002; Sunnaker et al., 2013) based on a coevolutionary model and the assumption that data are available from repeated coevolutionary experiments. We test this approach on pseudo-observed data sets which we obtained by repeatedly simulating a coevolutionary experiment for  $r = 200$  or  $r = 10$  times. We are able to extract information about the cost of infection, a parameter substantially shifting the equilibrium frequencies, with good accuracy. The inference works best when polymorphism data of both the host and the parasite are available. However, this requires that some information about other parameters such as population sizes or cost of resistance are available.

## 102 2. Methods and Material

### 103 2.1. Simulation of polymorphism data

104 We model coevolution between a single host and a single parasite species. The  
 105 coevolutionary interaction is driven by a single bi-allelic major gene in each hap-  
 106 loid species. Hosts are either resistant (*RES*) or susceptible (*res*) and parasites are  
 107 either non-infective (*ninf*) or infective (*INF*). Thus, the model follows a gene-for-  
 108 gene interaction with the following infection matrix:

$$\begin{array}{cc} & \begin{array}{cc} ninf & INF \end{array} \\ \begin{array}{c} RES \\ res \end{array} & \left( \begin{array}{cc} 0 & 1 \\ 1 & 1 \end{array} \right). \end{array} \quad (1)$$

109 A 1-entry in the infection matrix indicates that the parasite is able to infect the  
 110 host and a 0-entry indicates that the host is fully resistant towards the parasite.  
 111 To obtain polymorphism data at these major genes we combine a forward-in-time  
 112 coevolutionary model (Tellier and Brown, 2007) including genetic drift and recur-  
 113 rent mutations with backward-in-time coalescent simulations (Tellier et al., 2014).

#### 114 2.1.1. Forward in time coevolution model

115 In the forward part, we obtain the frequencies of the different alleles at the begin-  
 116 ning of each discrete host generation  $g$  in three steps:

- 117 1. Using a discrete-time gene-for-gene coevolution model (shown below) we

- 118 compute the expected allele frequencies in the next generation (in infinite  
119 population size)
- 120 2. We incorporate genetic drift by performing a binomial sampling based on  
121 the frequency of the *RES*-allele (*INF*-allele) after selection and the finite  
122 and fixed haploid host population size  $N_H$  (parasite population size  $N_P$ ).
- 123 3. We allow for recurrent allele mutations to take place and change genotypes  
124 from *RES* to *res* at rate  $\mu_{Rtor}$  or *res* to *RES* at rate  $\mu_{rtoR}$  in the host and from  
125 *ninf* to *INF* at rate  $\mu_{ntoI}$  and from *INF* to *ninf* at rate  $\mu_{Iton}$  in the parasite.  
126 Henceforward, we call such mutations as functional mutations. We set all  
127 functional mutation rates to  $\mu_{Rtor} = \mu_{ntoI} = \mu_{rtoR} = \mu_{Iton} = 10^{-5}$ .

128 Repeating this procedure for  $g_{max}$  host generations, we obtain the so called fre-  
129 quency path, which summarizes the allele frequencies at both loci forward in time.

130

131 The coevolution model (henceforward termed **model A**) is based on the poly-  
132 cyclic auto-infection model in Tellier and Brown (2007). It incorporates fitness  
133 costs for the *RES*-allele ( $c_H$ ) and the *INF*-allele ( $c_P$ ). There are  $T = 2$  discrete  
134 parasite generations per discrete host generation  $g$  and disease transmission is  
135 frequency-dependent. Successive parasite generations  $t$  ( $t > 1$ ) within host gen-  
136 eration  $g$  infect the same host as their parent at rate  $\psi = 1$  (auto-infection rate).  
137 Once a host becomes infected in parasite generation  $t$  it stays infected until it dies  
138 from natural death at the end of generation  $g$ . The total amount of fitness loss for  
139 a host which has been infected in parasite generation  $t$  within host generation  $g$  is  
140  $s_t$ .  $s_t$  is a function of the number of parasite generations a host is infected and the  
141 cost of being infected  $s$  (cost of infection) for a whole host generation:

$$s_t = s \cdot \left( \frac{T - (t - 1)}{T} \right) \quad (2)$$

142 The allele frequencies of resistant hosts ( $R_g$ ), susceptible hosts ( $r_g$ ), non-infective  
143 parasites ( $A_{g,t}$ ) and infective parasites ( $a_{g,t}$ ) are given by the following recursive  
144 equations (for the corresponding fitness matrices see Tab. S1):

$$a_{g,2} = \frac{a_{g,1} \cdot (1 - c_P)}{a_{g,1} \cdot (1 - c_P) + A_{g,1} \cdot r_g} \quad (3a)$$

$$a_{g+1,1} = \frac{(1 - c_P) \cdot [R_g (A_{g,1} a_{g,2} + a_{g,1}) + r_g a_{g,1}]}{(1 - c_P) \cdot [R_g (A_{g,1} a_{g,2} + a_{g,1}) + r_g a_{g,1}] + r_g A_{g,1}} \quad (3b)$$

$$R_{g+1} = \frac{R_g \cdot (1 - c_H)(A_{g,1} A_{g,2} + A_{g,1} a_{g,2}(1 - s_2) + a_{g,1}(1 - s_1))}{R_g \cdot (1 - c_H)(A_{g,1} A_{g,2} + A_{g,1} a_{g,2}(1 - s_2) + a_{g,1}(1 - s_1)) + r_g(1 - s_1)} \quad (3c)$$

145 with  $A_{g,t} = 1 - a_{g,t}$  and  $r_g = 1 - R_g$ . The equilibrium frequencies  $\hat{a}$ ,  $\hat{R}$  (Tellier  
146 and Brown, 2007) at the internal, non-trivial equilibrium point are approximately  
147 given by:

$$\begin{aligned} \hat{a} &\approx \frac{s_2 + s_1 - \sqrt{(s_2 + s_1)^2 - 4s_2(s_1 - c_H)}}{2s_2(1 - c_H)} \\ \hat{R} &\approx \frac{c_P}{2 - c_P - \hat{a}} \\ &\approx \frac{2c_P \cdot s_2 \cdot (1 - c_H)}{s_2(3 - 4c_H - 2c_P(1 - c_H)) - s_1 + \sqrt{(s_2 + s_1)^2 - 4s_2(s_1 - c_H)}} \end{aligned} \quad (4)$$

148 For investigating the link between coevolutionary dynamics in infinite population  
149 size and genomic signatures in finite population size, we further use these recur-  
150 sion equation to simulate allele frequency trajectories in infinite population size  
151 for  $g_{max} = 30,000$  generations (without genetic drift and recurrent mutations) for  
152 all pairwise combinations of  $s = \{0.2, 0.3, 0.4, 0.5, 0.6, 0.7, 0.8\}$ ,  $c_P = \{0.1, 0.3\}$   
153 and  $c_H = \{0.05, 0.1\}$ .

154 Additionally, we use two extensions, **B** and **C** respectively, of the basic model to  
 155 check for the generality of our results. In model **B**, we extend model **A** to more  
 156 than two parasite ( $T > 2$ ) generations per host generation  $g$  (Eq. S5). Model **C**  
 157 extends model **A** (keeping  $T = 2$ ) by allowing for allo-infections to take place at  
 158 rate  $(1 - \psi)$  in the second parasite generation ( $t = 2$ ) within host generation  $g$  (Eq.  
 159 S6).

### 160 2.1.2. Backward in time coalescent

161 To obtain polymorphism data for neutral sites being linked to the coevolving loci  
 162 we combine the obtained frequency paths which include genetic drift and recur-  
 163 rent mutations with coalescent simulations separately for the host and the para-  
 164 site. Therefore, we first rescale time for the frequencies paths appropriately (for  
 165 more information see S1.1.1). Based on these time-rescaled frequency paths we  
 166 launch a modified version of msms (Ewing and Hermisson, 2010; Tellier et al.,  
 167 2014) once for each species. We set the sample size to  $n_H = 50$  for the host  
 168 ( $n_P = 50$  for the parasite). For both species we assume a non-recombining lo-  
 169 cus of length 2500 bp and a per site neutral mutation rate of  $10^{-7}$ . Accordingly,  
 170 the neutral population mutation rate is  $\theta_H = 2 \cdot N_H \cdot 2500 \cdot 10^{-7}$  for the host  
 171 ( $\theta_P = 2 \cdot N_P \cdot 2500 \cdot 10^{-7}$  for the parasite). Based on the respective msms-output  
 172 we calculate eight summary statistics for each species which are based on the site  
 173 frequency spectrum (SFS) (Tab. S5). In addition to these 16 summary statistics we  
 174 calculate an additional summary statistic (**Pairwise Manhattan Distance**) which is  
 175 combining information from host and parasite polymorphism data (see S2).

## 176 2.2. *Generating pseudo-observed data sets (PODs)*

177 To understand the link between coevolutionary dynamics in finite population size  
 178 and genomic signatures we simulate pseudo-observed data sets (PODs) for various  
 179 costs of infection ( $s$ ). This parameter strongly influences the coevolutionary dy-  
 180 namics, namely the allele frequencies at the non-trivial equilibrium point and the  
 181 stability of the internal equilibrium point (Fig. 1 and Tab. S3, Tellier and Brown,  
 182 2007). Therefore by changing  $s$ , we can investigate a continuum between arms-  
 183 race and trench-warfare dynamics with varying internal equilibrium frequencies.  
 184 We vary  $s$  from 0.2 to 0.8 in steps of 0.1. We simulate  $r = 200$  repetitions for  
 185 each value of  $s$  using the above mentioned forward-backward approach, and after-  
 186 wards average the summary statistics across the  $r = 200$  repetitions/per parameter  
 187 combination/per model. For the so called standard case we fix the parameters as  
 188 follows:  $c_H = 0.05$ ,  $c_P = 0.1$ ,  $N_H = N_P = 10,000$ ,  $n_H = n_P = 50$ . We extend this  
 189 standard case in two ways. First, we simulate data for various combinations of  
 190 host population size  $N_H = (5,000; 10,000; 15,000)$  and parasite population size  
 191  $N_P = (5,000; 10,000; 15,000)$ . Second, we assess the signatures for combina-  
 192 tions of  $c_H = (0.05, 0.1)$  and  $c_P = (0.1, 0.3)$  while fixing the population sizes to  
 193 their standard values.

## 194 2.3. *Performing ABC on the pseudo-observed data sets for model A*

195 As a proof of principle we aim to infer different parameters determining the co-  
 196 evolutionary dynamics in Model A. In scenario 1, we aim to infer simultaneously  
 197 the cost of infection ( $s$ ), the host population size ( $N_H$ ) and the parasite population  
 198 size ( $N_P$ ) assuming that we know the true cost of resistance  $c_H$  and the true cost

of infectivity  $c_P$ . In scenario 2, our goal is to infer simultaneously the cost of infection ( $s$ ), the cost of infectivity ( $c_P$ ) and the cost of resistance ( $c_H$ ) assuming we know the true host ( $N_H$ ) and parasite population sizes ( $N_P$ ). In doing so we further test for the effect of the number of repetitions on the inference results. Thus, we base our inference on the average summary statistics of  $r = 200$  and  $r = 10$  repetitions. Besides the effect of the number of repetitions, we access how the type of polymorphism data available affects the accuracy of inference. Therefore, we perform inference based on a) polymorphism data of both, the host and the parasite, b) polymorphism data of the host and c) polymorphism data of the parasite. For the sampling step of the ABC we use the ABCsampler from ABCtoolbox (Wegmann et al., 2010) and perform 100,000 simulations using the standard sampler. The chosen priors, complex parameters and fixed parameters can be found in Tab. S6. For the estimation step we retain the 1% best simulations and apply the post-sampling adjustment (generalized linear model) as implemented in ABCestimator (Wegmann et al., 2010). All codes and pipelines used are available upon request (and will be placed on a Dryad repository).

### 3. Results

#### 3.1. Link between coevolutionary dynamics and sequence data

The internal equilibrium frequency of the *RES*-allele mainly increases with increasing cost of infectivity ( $c_P$ ) (Fig. 1 a+b vs. Fig. 1 c+d), increases very slightly with increasing cost of infection ( $s$ ) and remains almost unaffected by changing costs of resistance ( $c_H$ ) (Fig. 1 a+c vs. Fig. 1 b+d). The opposite is true for

the parasite. Here, the equilibrium frequency of the infective (*INF*)-parasite rises mainly with increasing cost of infection ( $s$ ) (Fig. 1). Higher costs of resistance ( $c_H$ ) decrease the equilibrium frequency of *INF*-parasites (Fig. 1 a+c vs. Fig. 1 b+d) for a given value of  $s$ . In contrast to the host, the equilibrium frequencies in the parasite are almost unaffected by changes in the cost of infectivity ( $c_P$ ). For high costs of infection  $s$  the dynamics are always switching to arms-race dynamics, irrespectively of the underlying costs of resistance and infectivity (Fig. 1, Fig. S7).

The changes in equilibrium frequencies with changing cost of infection ( $s$ ), cost of resistance ( $c_H$ ) and changing cost of infectivity ( $c_P$ ) are reflected by the resulting genomic signatures at the coevolving genes (Fig. 2). Generally, the strongest signatures of balancing selection (here indicated by high Tajima's D values) can be observed when the equilibrium frequencies of *INF*-parasites or *RES*-hosts are close to 0.5 (see Fig. 1, Tab. S3, Fig. 2). The strength of the signatures declines the further the equilibrium frequencies move away from 0.5.

The genomic signature in the parasite changes strongly with changing cost of infection ( $s$ ), irrespectively of  $c_H$  and  $c_P$ . Further, the resulting genomic signatures in the parasites for a given cost of infection  $s$  are distinguishable for different costs of resistance but not for different costs of infectivity.

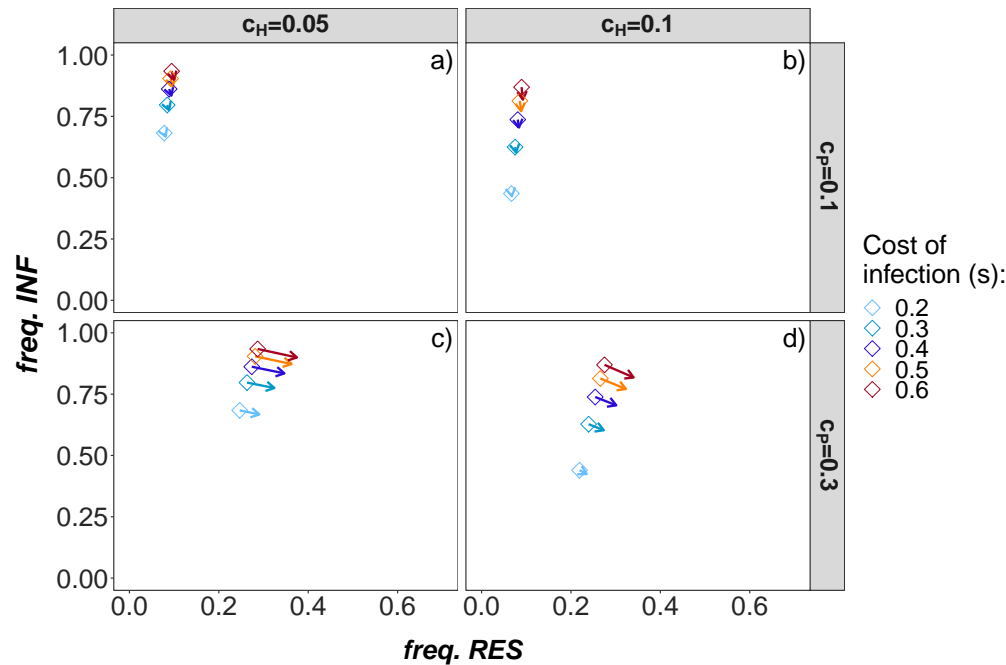

**Figure 1:** Deterministic equilibrium frequencies for model A (pure autoinfection model with  $T = 2$  parasite generations) for different combinations of cost of resistance  $c_H = (0.05, 0.1)$  (columns), cost of infectivity  $c_P = (0.1, 0.3)$  (rows) and cost of infection  $s = (0.2, 0.3, 0.4, 0.5, 0.6, 0.7, 0.8)$  (color of the squares). Only combinations with trench-warfare dynamics are shown. Centres of the squares represent the equilibrium frequencies obtained by simulating numerically the recursion equations Eq. 3 for 30,000 generations starting with an initial frequency of  $R_0 = 0.2$  resistant hosts and  $a_0 = 0.2$  infective parasites. Heads of the arrows represent the equilibrium frequencies based on Eq. 4 which slightly differ from the numerical computations due to analytical approximations.

240 The genomic signature in the host changes very slightly with increasing cost of  
 241 infection ( $s$ ) as the respective equilibrium frequencies are strongly affected by  $c_P$ .  
 242 Thus, the strongest balancing selection signature for the host is found for an in-  
 243 creased costs of infectivity ( $c_P = 0.3$ ) and intermediate costs of infection.

244 The combination of host and parasite signatures holds the highest information  
 245 content about the fitness parameters guiding the coevolutionary dynamics. This is  
 246 due to the fact that the equilibrium frequencies in the host and parasite are differ-  
 247 entially affected by these fitness parameters. The genomic signature in the host is  
 248 mainly indicative about the cost of infectivity ( $c_P$ ), a cost which is affecting the  
 249 parasite fitness, whereas the signature in the parasite is mainly informative about  
 250 the costs of resistance ( $c_H$ ) and infection ( $s$ ), parameters with a direct fitness effect  
 251 in the host (Fig. 2). This results from the action of niFDS. Increasing costs of re-  
 252 sistance ( $c_H$ ) disfavor resistant hosts. Thus, the frequency of infective parasites is  
 253 decreasing which results in lower equilibrium frequencies of *INF*-parasites. The  
 254 opposite is true for increasing costs of infectivity ( $c_P$ ). This cost reduces the fit-  
 255 ness of *INF*-parasites which in turn favors *RES*-hosts compared to *res*-hosts.

256 The qualitative changes of the genomic signatures for changing costs of infec-  
 257 tion in the standard case remain similar even when population sizes differ in both  
 258 interacting partners (Fig. 3). However, the strength of genomic signatures is af-  
 259 fected by the population sizes. The strongest signature of balancing selection in  
 260 the parasite is found when the parasite population size is small compared to the  
 261 host population size (Fig. 3c). Here, the large host population size reduces the  
 262 amount of genetic drift in the host. Thus, there are less allele frequency fluctua-  
 263 tions in the host around the internal equilibrium point. This in turn, also reduces  
 264 allele frequency fluctuations in the parasite.

265 Overall, there is a strong link between the equilibrium frequencies under trench-  
 266 warfare dynamics and the resulting genomic signatures. We obtain similar results  
 267 when we slightly modify the assumptions about the coevolutionary interaction by  
 268 either a) extending the model to more than two parasite generations per host gen-

eration (**Model B**, Fig. S1, Fig. S3cd) or b) allowing for allo-infections at rate  
 $1 - \psi$  in the second parasite generation within host generation  $g$  (**Model C**, Fig.  
S2, Fig. S3ab). Increasing the number of parasite generations extends the param-  
eter space in which trench-warfare dynamics occur. Here, the strongest signatures  
of balancing selection are found for intermediate costs of infection (Fig. S3). Al-  
lowing for allo-infections, decreases the parameter space in which trench-warfare  
dynamics take place and thus, also the range in which balancing selection signa-  
tures can be observed in both interacting partners (Fig. S3ab).

The strong link between equilibrium frequencies and resulting genomic signatures  
can be explained in terms of a structured coalescent tree. The coalescent tree in  
both coevolving species consists of two demes (*RES* and *res* for the host and *INF*  
and *ninf* for the parasite). As we assume that the neutral sites are fully linked to  
the coevolving locus neutral mutations are usually linked to the allele in which  
they arose, unless a functional mutation is taking place and accordingly, one lin-  
eage is migrating from one deme to the other. When the frequencies of both alleles  
(*ninf* and *INF* in the parasite or *RES* and *res* in the host) are fairly similar they  
have equal contributions to the sample. Thus, the underlying coalescent tree is  
well balanced. Accordingly, we observe an excess of intermediate frequency vari-  
ants in the SFS. As the equilibrium frequencies move away from 0.5, the average  
sample configuration changes and the coalescent tree becomes less balanced (see  
Fig. S7 a-c and p-r). Therefore, the number of SNPs at intermediate frequencies  
drops and Tajima's D decreases (Fig. 2).

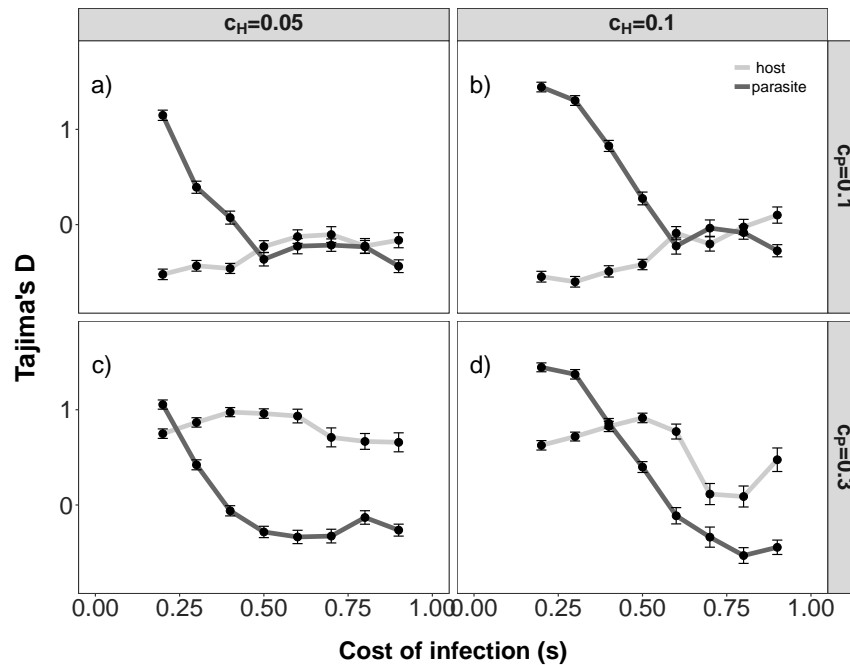

**Figure 2:** Tajima's D (y-axis) for model A for various cost of infection  $s$  (x-axis). The results are shown for different combinations of  $c_P$  ( $c_P = 0.1$  top,  $c_P = 0.3$  bottom) and  $c_H$  ( $c_H = 0.05$  left,  $c_H = 0.1$  right). The mean and standard error of Tajima's D of the parasite population (dark grey) and of the host population (light grey) are plotted for  $r = 200$  repetitions. The other parameters are fixed to:  $N_H = N_P = 10,000$ ,  $n_H = n_P = 50$ ,  $\theta_H = \theta_P = 5$ ,  $\mu_{Rtor} = \mu_{rtoR} = \mu_{ntoI} = \mu_{Itot} = 10^{-5}$ .

### 291 3.2. Inference of coevolutionary dynamics from polymorphism data

292 Our results clearly indicate that it is possible to infer the cost of infection using  
 293 polymorphism data from the host and parasite (Fig. 4, Fig. 5). The accuracy of  
 294 inference mainly depends on four factors being 1) the true value of the cost of in-  
 295 fection, 2) the type of polymorphism data being used (host and parasite together,

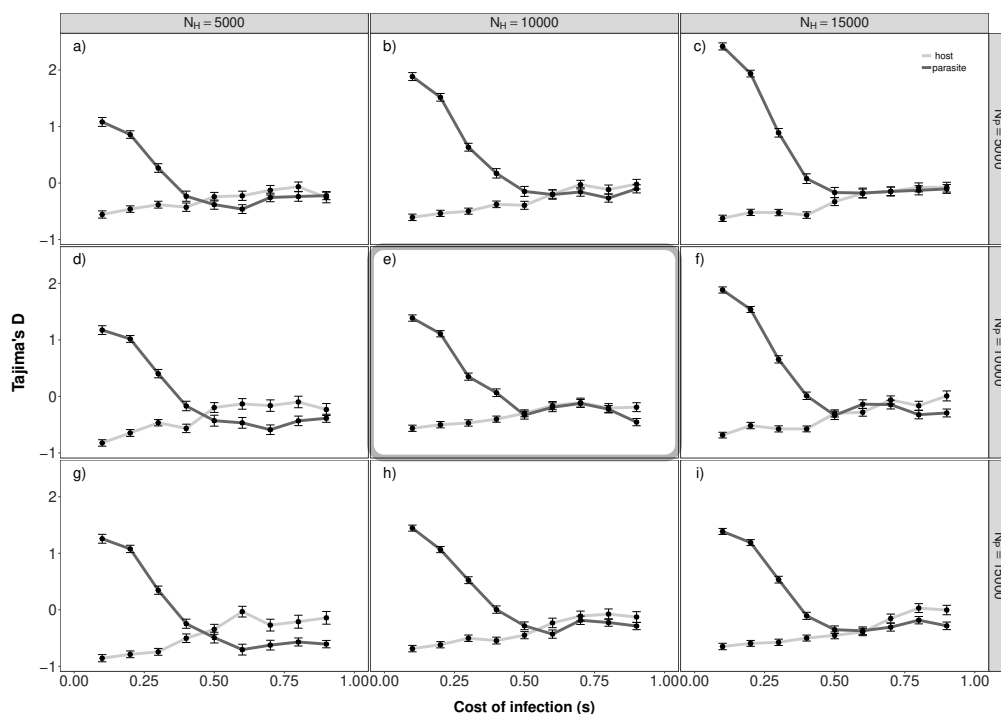

**Figure 3:** Tajima's D (y-axis) for **Model A** for various cost of infection  $s$  (x-axis) and different combinations of  $N_P$  ( $N_P = 5,000$  top,  $N_P = 10,000$  middle,  $N_P = 15,000$  bottom) and  $N_H$  ( $N_H = 5,000$  left,  $N_H = 10,000$  middle,  $N_H = 15,000$  right). The mean and standard error of Tajima's D of the parasite population (dark grey) and of the host population (light grey) are plotted for  $r = 200$  repetitions. Note that subfigure  $e$  corresponds to Fig. 2a. The other parameters are fixed to:  $c_H = 0.05$ ,  $c_P = 0.1$ ,  $\theta_H = N_H/2000$ ,  $\theta_P = N_P/2000$ ,  $n_H = n_P = 50$ ,  $\mu_{Rtor} = \mu_{rtor} = \mu_{ntol} = \mu_{Iton} = 10^{-5}$ .

only host or only parasite), 3) the number of available repetitions and 4) the type of known parameters.

Inferences of the cost of infection and of the population sizes are the most accurate if the number of repetitions is high ( $r = 200$ ), and host and parasite polymorphism data are both available (Fig. 4, Fig. S4, Fig. S5). Generally, inference for Scenario 1 works best if host and parasite data are used together, irrespectively of the number of repetitions available (compare Fig. 4a to Fig. 4b+c; Fig. 4d to Fig. 4e+f). Using parasite polymorphism data only is also quite powerful for small to intermediate values of the cost of infection ( $s < 0.6$ ) (Fig. 4c+f) where trench-warfare dynamics take place and SFS of the parasite changes pronouncedly with  $s$  (Fig. S7). In contrast, using only host polymorphism shows markedly less power in the same parameter range (Fig. 4b+e), especially if the number of available repetitions is low. For low costs of infection the respective equilibrium frequencies of the *RES*-genotype are close to zero ( $< 0.1$ ) and increase only very slightly when  $s$  increases (Tab. S3). Thus, the host sample mostly consists of polymorphism data from *res*-hosts. Accordingly, the coalescent tree consists of a very large subtree containing the *res*-samples and a very small subtree containing the *RES*-samples and the overall tree looks almost neutral (Fig. 2). The power of estimating the cost of infection using only host information diminishes in the transition between trench-warfare and arms-race dynamics (around  $s \approx 0.6$ ), especially if the number of repetitions is low ( $r = 10$ ). In this range, fixation of alleles in both species can either happen due to genetic drift or due to the inherent dynamics of the coevolutionary interaction. This effect decreases the accuracy of parameter estimation even if host and parasite polymorphism data are available (Fig. 4a+d, Fig. 2). The results clearly indicate that the availability of more repetitions increases the

accuracy of inference (compare Fig. 4a-c to Fig. 4d-f). There are three sources of stochasticity affecting the neutral polymorphism around the coevolutionary loci:

- 1) The effect of genetic drift on the allele frequency trajectory under coevolution,
- 2) the stochasticity in the coalescent process for a given allele frequency trajectory and
- 3) the stochasticity in the neutral mutation process on top of the coalescent process.

As the first type of stochasticity affects the 'population' sizes of the functional alleles in the host (in the parasite) over time it also has a subsequent effect on the other two sources of stochasticity. Using data from several repetitions allows to better handle and to average out the effect of genetic drift on the variability of the allele frequency path and its subsequent effect on the observed summary statistics. This is especially helpful in the range of parameter values where the dynamics switch from arms-race to trench-warfare.

Like in scenario 1 inference for scenario 2 works best if data from both the host and the parasite are available for a large amount of repetitions  $r = 200$ . However, the accuracy of inference for the cost of infection  $s$  is generally not as accurate as in scenario 1. Simultaneous inference of all three parameters in scenario 2 is most accurate for intermediate costs of infection and if both, host and parasite polymorphism data, are available. This is due to the fact that signatures in the host and the parasite are differentially affected by the various costs (Fig. 2).

Inference of the cost of resistance ( $c_H$ ) works reasonably well if polymorphism data only from the parasite are available. However, this comes at the cost of less accurate inference of the cost of infection ( $s$ ) as both parameters are affecting the equilibrium frequency in the parasite (Fig. 4, Fig. 5). While the equilibrium frequency of *INF*-parasites increases with increasing cost of infection, an increase in the cost of resistance for a fixed cost of infection ( $s$ ) decreases the respective

equilibrium frequency. Thus, overestimating the cost of infection ( $s$ ) can be compensated by overestimating the cost of resistance ( $c_H$ ) simultaneously. This effect can be seen for low costs of infection ( $s$ ) if only the information from the parasite polymorphism data is used in Scenario 2 (see Fig. 5 c+f). In contrast, inference of the cost of infectivity ( $c_P$ ) works reasonably well if polymorphism data only from the host are available. This is due to the fact that changing costs of infectivity ( $c_P$ ) mainly affect the equilibrium frequencies in the host but not in the parasite (Fig. 1). Therefore, inference of this parameter does not work if only parasite polymorphism data are available. All the above mentioned effects explain why the simultaneous inference of several cost becomes less accurate with less ( $r = 10$ ) repetitions (Fig. S6).

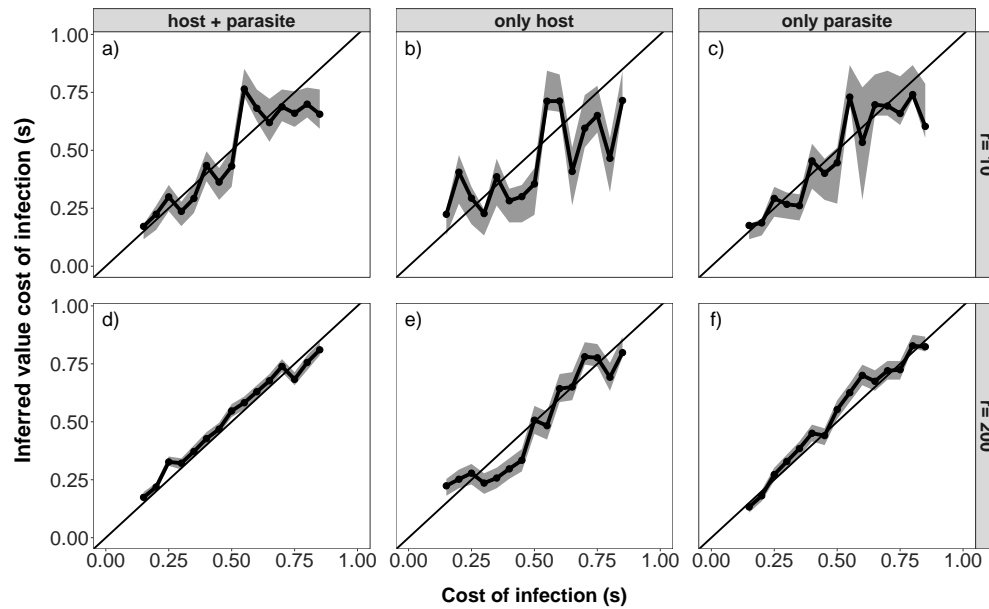

**Figure 4:** Median of the posterior distribution (y-axis) for the cost of infection  $s$  compared to the true value (x-axis) for  $r = 10$  (top, a-c) and  $r = 200$  (bottom, d-f). The inference results for scenario 1 based on host and parasite polymorphism data (left, a+d), host polymorphism data only (middle, b+e) and parasite polymorphism data only (right, c+f) are shown. The chosen parameters are:  $c_H = 0.05$ ,  $c_P = 0.1$ , functional mutation rate  $10^{-5}$ ,  $c_H = 0.05$ ,  $c_P = 0.1$ ,  $g_{max} = 30,000$ ,  $\theta_H = 5$ ,  $\theta_P = 5$ ,  $n_H = 50$  and  $n_P = 50$ . Priors have been chosen as follows:  $N_H$  log uniform(2000, 40000),  $N_P$  log uniform(2000, 40000),  $s$  uniform (0.1, 0.9).  $s$ ,  $N_H$  and  $N_P$  are inferred simultaneously for all plots.

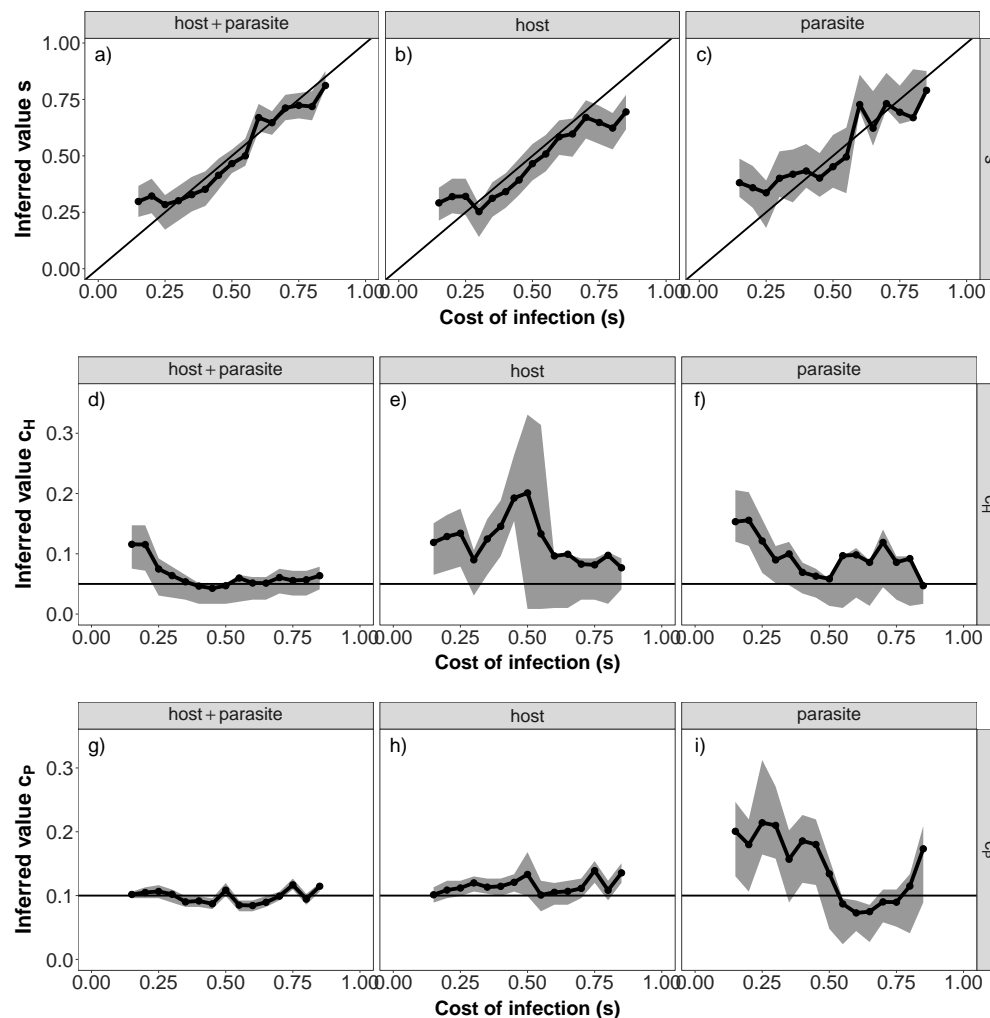

**Figure 5:** Median of the posterior distribution (y-axis) for the cost of infection  $s$  (a-c), cost of resistance  $c_H$  (d-f) and cost of infectivity  $c_P$  (g-i) compared to the true value (x-axis) for  $r = 200$ . Inference results for scenario 2 are based on host and parasite polymorphism data (left, a+d+g), host polymorphism data only (middle, b+e+h) and parasite polymorphism data only (right, c+f+i). The chosen parameters are:  $N_H = N_P = 10,000$ , functional mutation rate  $10^{-5}$ ,  $g_{max} = 30,000$ ,  $\theta_H = 5$ ,  $\theta_P = 5$ ,  $n_H = 50$  and  $n_P = 50$ . Priors have been chosen as follows:  $s$  uniform(0.1, 0.9),  $c_H$  uniform (0.01, 0.35),  $c_P$  uniform(0.01, 0.35).  $s$ ,  $c_H$  and  $c_P$  are inferred simultaneously for all plots.

## 357 4. Discussion

358 We could establish the link between coevolutionary dynamics (Fig. 1), the result-  
 359 ing genomic signatures (Fig. 2, Fig. 3) and subsequently the amount of in-  
 360 formation about the underlying coevolutionary dynamics which can be extracted  
 361 from genomic signatures at the coevolving loci (Fig. 4, Fig. 5). Our results in-  
 362 dicate that under trench-warfare dynamics the allele frequencies at the non-trivial  
 363 internal equilibrium point affect the strength of genomic signatures at the coe-  
 364 volving genes in both, the host and parasite. We further could show as a proof of  
 365 principle that it is possible to infer information about parameters underlying the  
 366 coevolutionary interaction from polymorphism data at the genes under coevolu-  
 367 tion if some relevant parameters such as diverse costs (Fig. 4) or population sizes  
 368 (Fig. 5) are known. This is due to the fact that various parameter combinations  
 369 can give rise to similar equilibrium frequencies and thus, result in undistinguish-  
 370 able genomic signatures. In general, inference works best if polymorphism data  
 371 from both the host and the parasite are available from repeated experiments.

372 As already shown in Tellier et al. (2014) the link between coevolutionary dynam-  
 373 ics in finite population and resulting signatures at the coevolving loci is not always  
 374 black (arms-race result in selective sweep signatures) and white (trench-warfare  
 375 dynamics in balancing selection signatures) but follows a continuum of outcomes.

376 The strength of the genomic signatures under trench-warfare dynamics is a result  
 377 of the internal equilibrium frequencies, the fluctuations around these equilibrium  
 378 frequencies, the amount of genetic drift in both partners and the proximity of these  
 379 equilibrium frequencies to the fixation boundaries. When equilibrium frequencies  
 380 are close to boundaries, alleles can be easily lost by drift and thus, arms-race dy-

381 namics take place although trench-warfare dynamics would be predicted based on  
 382 the model. In such cases signatures of balancing selection cannot be observed.  
 383 The found links between dynamics in infinite population size and genomic signa-  
 384 tures in finite population size have several implications. Model based inference of  
 385 parameters governing the coevolutionary dynamics is possible if they substantially  
 386 shift the equilibrium frequencies of the dynamics and thus, the resulting genomic  
 387 signatures. In cases where different parameters shift the equilibrium frequencies  
 388 along the same axis, three different inference scenarios are possible. First, it is  
 389 only possible to infer a compound parameter if there is no *a priori* information  
 390 available. This is illustrated by the inference results for scenario 2 when only  
 391 parasite polymorphism data are available (Fig. 5). Here, overestimating the cost  
 392 of infection  $s$  compensates for overestimating the cost of resistance  $c_H$ . Second,  
 393 if some of these parameters are known *a priori*, the other parameters can be in-  
 394 ferred conditional on this information. Third, the parameters have different effects  
 395 on the equilibrium frequencies in the host and parasite and, thus, combining host  
 396 and parasite polymorphism data allows to infer the different parameters simulta-  
 397 neously.  
 398 For many host-parasite models (including the one used here) it has been shown  
 399 that the equilibrium frequencies in the host are substantially or exclusively af-  
 400 fected by fitness penalties applying to the parasite and vice-versa. Thus gener-  
 401 ally speaking, the strength of genomic signatures in either species are presumably  
 402 most indicative about processes affecting the coevolving partner. We therefore  
 403 speculate, that the balancing selection signatures which have been found at R-  
 404 genes in *Arabidopsis thaliana* (Stahl et al., 1999; Bakker et al., 2006) (Karasov  
 405 et al., 2014), *Solanum sp.* (Rose et al., 2007; Hoerger et al., 2012; Caicedo and

406 Schaal, 2004), *Phaseolus vulgaris* (De Meaux et al., 2003), *Capsella* (Gos et al.,  
407 2012), are indicative about the selective pressure in the coevolving parasite or par-  
408 asite community. Conversely, the long term maintenance of strains in *P. syringae*  
409 (Karasov et al., 2018) could reflect fitness costs in *A. thaliana*.

410 Further, we have shown that the genomic signatures might be rather weak and  
411 almost undistinguishable from neutral signatures if the the internal equilibrium  
412 frequencies are close to fixation. In such cases it is very likely that genes under  
413 coevolution are missed when applying classic outlier scan methods.

414 In general, our results should not be restricted to the used coevolution model (see  
415 Appendix). We acknowledge that we assumed the most simple type of coevolu-  
416 tionary interaction possible. However, understanding the link between dynamics,  
417 signatures and resulting accuracy of inference is a useful starting point to develop  
418 a further and deeper understanding when several major genes are involved into the  
419 coevolutionary interaction. There are various other coevolution models with re-  
420 spect to the biology of the coevolving species or the ecology of the disease which  
421 have been shown to result in trench-warfare dynamics. Nevertheless as long as  
422 the coevolutionary interaction is driven by a single bi-allelic locus in each species,  
423 the resulting equilibrium frequencies will be always confined to the 2-dimensional  
424 plane and a limited amount of possible genomic signatures (see Fig. S1, Fig. S1  
425 and Fig. S3). Therefore, our findings should also apply to coevolutionary epi-  
426 demiology models such as in Ashby and Boots (2017); Gokhale et al. (2013).

427 So far we did not take population size changes and the resulting temporal vari-  
428 ation in the amount of genetic drift into account. In host-parasite coevolution,  
429 population size changes can be due to two different sources: 1) Population size  
430 changes which are independent of the coevolutionary interaction and 2) popula-

tion size changes which arise as an immediate result of coevolutionary interaction, e.g. from epidemiological feedback or any other form of eco-evolutionary feedback. Independently of the particular source, demographic changes always affect all loci in the genome simultaneously. Therefore, existing methods to estimate the demography based on whole-genome data may offer the possibility to approximate the demographic history of both species, especially if time sampled data are available. However, the resolution of the demography depends on the amplitude and time-scales on which such population size fluctuations take place. Živković et al. (2019) could show that fluctuations in population size arising from host-parasite coevolution only leave a signature in the genome-wide parasite site frequency spectrum if they happen at a slow enough time scale. Irrespectively of whether the demographic changes can be resolved from genome-wide data or not, the resulting genomic signatures at the coevolving loci will be always the result of the allele frequency path at the coevolving locus itself. Therefore, further studies should focus on the specific effect of eco-evolutionary feedback on the variability of the allele frequency path and the resulting effect of the population size changes on mutation supply at the coevolving loci.

We could show that of our ABC-approach is suited to infer the cost of infection with very good accuracy by jointly using host and parasite polymorphism data from repeated experiments. Thus, we could demonstrate as a proof-of-principle that there is enough information contained in the site frequency spectra of the loci under coevolution to infer information about the past coevolutionary history. So far, our approach relies on data from repeated experiments and it is probably best met by data from microcosm experiments (e.g. Hall et al., 2011; Frickel et al., 2016) where coevolutionary interactions can be tracked across several replicates

456 for a reasonable amount of generations. Using data from repeated experiments  
457 is one possible attempt to deal with the variability in allele frequency trajectories  
458 resulting from the interaction between genetic drift and coevolution. The usage of  
459 data from several independent populations or the usage of time-sampled might be  
460 possible alternatives. Time samples offer an at least partially time-resolved view  
461 on changes in allele frequencies and accordingly, can help to better capture the  
462 coevolutionary dynamics.

463 Our results further show that analyzing both interacting partners in a joint frame-  
464 work rather than analyzing them separately helps to better recover information  
465 about the coevolutionary history. This is in line with recent method developments  
466 (MacPherson et al., 2018; Nuismer et al., 2017; Wang et al., 2018) which show  
467 the value of analyzing hosts and parasite in a joint framework. Additionally, these  
468 methods can be promising approaches to identify candidate genes being involved  
469 into the coevolutionary interaction on which our approach is based on.

470 Overall, we investigated the link between coevolutionary dynamics and resulting  
471 genomic signatures and quantify the amount of information available in polymor-  
472 phism data. Although, we started from a very simple coevolutionary interaction  
473 we could show that model-based inference is possible. With growing availability  
474 of highly resolved genome data, even of non-model species, it is important to gain  
475 a differentiated and deep understanding of the continuum of possible links be-  
476 tween coevolutionary dynamics without or with eco-evolutionary feedbacks and  
477 their effect on polymorphism data. Such as thorough understanding is the basis  
478 for devising appropriate sampling schemes, for using optimal combinations of di-  
479 verse sources of information and for developing model-based refined inference  
480 methods.

- 481 Agrawal, A., Lively, C., 2002. Infection genetics: gene-for-gene versus matching-  
482 alleles models and all points in between. EVOL ECOL RES 4 (1), 79–90.
- 483 Ashby, B., Boots, M., 2017. Multi-mode fluctuating selection in host-parasite  
484 coevolution. ECOL LETT 20 (3), 357–365.  
485 URL <https://onlinelibrary.wiley.com/doi/abs/10.1111/ele.12734>
- 486 Bakker, E. G., Toomajian, C., Kreitman, M., Bergelson, J., 2006. A genome-wide  
487 survey of R gene polymorphisms in *Arabidopsis*. PLANT CELL 18 (8), 1803–  
488 1818.
- 489 Beaumont, M. A., Zhang, W. Y., Balding, D. J., 2002. Approximate bayesian  
490 computation in population genetics. Genetics 162 (4), 2025–2035.
- 491 Bergelson, J., Purrington, C., 1996. Surveying patterns in the cost of resistance in  
492 plants. AM NAT 148 (3), 536–558.
- 493 Brown, J. K. M., Tellier, A., 2011. Plant-parasite coevolution: Bridging the gap  
494 between genetics and ecology. ANNU REV PHYTOPATHOL 49, 345–367.
- 495 Caicedo, A., Schaal, B., 2004. Heterogeneous evolutionary processes affect R  
496 gene diversity in natural populations of *Solanum pimpinellifolium*. P NATL  
497 ACAD SCI USA 101 (50), 17444–17449.
- 498 Charlesworth, B., Nordborg, M., Charlesworth, D., 1997. The effects of local  
499 selection, balanced polymorphism and background selection on equilibrium  
500 patterns of genetic diversity in subdivided populations. GENET RES 70 (2),  
501 155–174.

- 502 Csillery, K., Blum, M. G. B., Gaggiotti, O. E., Francois, O., 2010. Approximate  
503 Bayesian Computation (ABC) in practice. *TRENDS ECOL EVOL* 25 (7), 410–  
504 418.
- 505 De Meaux, J., Cattan-Toupance, I., Lavigne, C., Langin, T., Neema, C., 2003.  
506 Polymorphism of a complex resistance gene candidate family in wild popu-  
507 lations of common bean (*Phaseolus vulgaris*) in Argentina: comparison with  
508 phenotypic resistance polymorphism. *MOL ECOL* 12 (1), 263–273.
- 509 Decaestecker, E., Gaba, S., Raeymaekers, J. A. M., Stoks, R., Van Kerckhoven, L.,  
510 Ebert, D., De Meester, L., 2007. Host-parasite 'Red Queen' dynamics archived  
511 in pond sediment. *NATURE* 450 (7171), 870–U16.
- 512 Ewing, G., Hermisson, J., 2010. MSMS: a coalescent simulation program in-  
513 cluding recombination, demographic structure and selection at a single locus.  
514 *BIOINFORMATICS* 26 (16), 2064–2065.
- 515 Fay, J. C., Wu, C.-I., 2000. Hitchhiking under positive darwinian selection. *GE-  
516 NETICS* 55 (1), 1405–1413.
- 517 Flor, H. H., 1971. Current status of the gene for gene concept. *ANNU REV PHY-  
518 TOPATHOL* 9, 275–296.
- 519 Frank, S., 1992. Models of plant pathogen coevolution. *TRENDS GENET* 8 (6),  
520 213–219.
- 521 Frickel, J., Sieber, M., Becks, L., 2016. Eco-evolutionary dynamics in a coevolv-  
522 ing host-virus system. *ECOL LETT* 19 (4), 450–459.

- 523 Fu, Y.-X., Li, W.-H., 1993. Statistical tests of neutrality of mutations. GENETICS  
524 133, 693–709.
- 525 Gokhale, C. S., Papkou, A., Traulsen, A., Schulenburg, H., 2013. Lotka-Volterra  
526 dynamics kills the Red Queen: population size fluctuations and associated  
527 stochasticity dramatically change host-parasite coevolution. BMC EVOL BIOL  
528 13.
- 529 Gos, G., Slotte, T., Wright, S. I., 2012. Signatures of balancing selection are main-  
530 tained at disease resistance loci following mating system evolution and a popu-  
531 lation bottleneck in the genus *Capsella*. BMC EVOL BIOL 12.
- 532 Hall, A. R., Scanlan, P. D., Morgan, A. D., Buckling, A., 2011. Host-parasite  
533 coevolutionary arms races give way to fluctuating selection. ECOL LETT 14,  
534 635–642.
- 535 Hoerger, A. C., Ilyas, M., Stephan, W., Tellier, A., van der Hoorn, R. A. L., Rose,  
536 L. E., 2012. Balancing selection at the Tomato RCR3 guard gene family  
537 maintains variation in strength of pathogen defense. PLOS GENET 8 (7).
- 538 Karasov, T. L., Almario, J., Friedemann, C., Ding, W., Giolai, M., Heavens, D.,  
539 Kersten, S., Lundberg, D. S., Neumann, M., Regalado, J., Neher, R. A., Kemen,  
540 E., Weigel, D., 2018. *Arabidopsis thaliana* and *Pseudomonas* pathogens ex-  
541 hibit stable associations over evolutionary timescales. CELL HOST MICROBE  
542 24 (1), 168+.
- 543 Karasov, T. L., Kniskern, J. M., Gao, L., DeYoung, B. J., Ding, J., Dubiella, U.,  
544 Lastra, R. O., Nallu, S., Roux, F., Innes, R. W., Barrett, L. G., Hudson, R. R.,

- 545 Bergelson, J., 2014. The long-term maintenance of a resistance polymorphism  
546 through diffuse interactions. NATURE 512 (7515), 436–U472.
- 547 Kraaijeveld, A., Godfray, H., 1997. Trade-off between parasitoid resistance and  
548 larval competitive ability in *Drosophila melanogaster*. NATURE 389 (6648),  
549 278–280.
- 550 Lenski, R., 1988. Experimental studies of pleiotropy and epistasis in *Escherichia-*  
551 *Coli* .1. Variation in competitive fitness among mutants resistant to Virus-T4.  
552 EVOLUTION 42 (3), 425–432.
- 553 Leonard, K. J., 1994. Stability of equilibria in a gene-for-gene coevolution model  
554 of host-parasite interactions. PHYTOPATHOLOGY 84 (1), 70–77.
- 555 MacPherson, A., Otto, S. P., Nuismer, S. L., 2018. Keeping pace with the Red  
556 Queen: Identifying the genetic basis of susceptibility to infectious disease. GE-  
557 NETICS 208, 779–789.
- 558 Martiny, J. B. H., Riemann, L., Marston, M. F., Middelboe, M., 2014. Antagonis-  
559 tic coevolution of marine planktonic viruses and their hosts. Vol. 6 of ANNU  
560 REV MAR SCI. pp. 393–414.
- 561 Maynard Smith, J., Haigh, J., 1974. The hitch-hiking effect of a favourable gene.  
562 GENET RES 23 (1), 23–35.
- 563 Nei, M., Tajima, F., 1981. DNA polymorphism detectable by restriction endonu-  
564 cleases. GENETICS 97, 145–165.
- 565 Nuismer, S. L., Jenkins, C. E., Dybdahl, M. F., 2017. Identifying coevolving loci  
566 using interspecific genetic correlations. ECOL EVOL 7 (17), 6894–6903.

567 Rose, L. E., Michelmore, R. W., Langley, C. H., 2007. Natural variation in the  
568 Pto disease resistance gene within species of wild tomato (*Lycopersicon*). II.  
569 Population genetics of Pto. GENETICS 175 (3), 1307–1319.

570 Seger, J., 1988. Dynamics of some simple host-parasite models with more than 2  
571 genotypes in each species. P ROY SOC B-BIOL SCI 319 (1196), 541–555.

572 Stahl, E. A., Dwyer, G., Mauricio, R., Kreitman, M., Bergelson, J., 1999. Dy-  
573 namics of disease resistance polymorphism at the Rpm1 locus of *Arabidopsis*.  
574 NATURE 400 (6745), 667–671.

575 Sunnaker, M., Busetto, A. G., Numminen, E., Corander, J., Foll, M., Dessimoz,  
576 C., 2013. Approximate Bayesian Computation. PLOS COMPUT BIOL 9 (1).

577 Tajima, F., 1989. Statistical method for testing the neutral mutation hypothesis by  
578 DNA polymorphism. GENETICS 123, 585–595.

579 Tellier, A., Brown, J. K. M., 2007. Stability of genetic polymorphism in host-  
580 parasite interactions. P ROY SOC B-BIOL SCI 274 (1611), 809–817.

581 Tellier, A., Moreno-Gamez, S., Stephan, W., 2014. Speed of adaptation and ge-  
582 nomic footprints of host-parasite coevolution under arms race and trench war-  
583 fare dynamics. EVOLUTION 68 (8), 2211–2224.

584 Thrall, P., Burdon, J., 2003. Evolution of virulence in a plant host-pathogen  
585 metapopulation. SCIENCE 299 (5613), 1735–1737.

586 Thrall, P. H., Laine, A.-L., Ravensdale, M., Nemri, A., Dodds, P. N., Barrett, L. G.,  
587 Burdon, J. J., 2012. Rapid genetic change underpins antagonistic coevolution  
588 in a natural host-pathogen metapopulation. ECOL LETT 15 (5), 425–435.

- 589 Wang, M., Roux, F., Bartoli, C., Huard-Chauveau, C., Meyer, C., Lee, H., Roby,  
590 D., McPeck, M. S., Bergelson, J., 2018. Two-way mixed-effects methods for  
591 joint association analysis using both host and pathogen genomes. P NATL  
592 ACAD SCI USA.  
593 URL <http://www.pnas.org/content/early/2018/05/29/1710980115>
- 594 Watterson, G. A., 1975. Number of segregating sites in genetic models without  
595 recombination. THEOR POPUL BIOL 7 (2), 256–276.
- 596 Wegmann, D., Leuenberger, C., Neuenschwander, S., Excoffier, L., 2010. ABC-  
597 toolbox: a versatile toolkit for approximate Bayesian computations. BMC  
598 BIOINFORMATICS 11.
- 599 Woolhouse, M., Webster, J., Domingo, E., Charlesworth, B., Levin, B., 2002.  
600 Biological and biomedical implications of the co-evolution of pathogens and  
601 their hosts. NAT GENET 32 (4), 569–577.
- 602 Zeng, K., Fu, Y.-X., Shi, S., Wu, C.-I., 2006. Statistical tests for detecting positive  
603 selection by utilizing high-frequency variants. GENETICS 174 (3), 1431–1439.
- 604 Živković, D., John, S., Verin, M., Stephan, W., Tellier, A., 2019. Neutral genomic  
605 signatures of host-parasite coevolution. bioRxiv.  
606 URL <https://www.biorxiv.org/content/early/2019/03/25/588202>

## 607 Supplementary information:

## 608 S1. Supplementary information models

### 609 S1.1. Model A

#### 610 S1.1.1. Detailed description how the allele frequency path is obtained

611 In order to obtain the frequency of a given allele in the next generation, we perform  
612 the following steps:

- 613 • We compute the allele frequency after selection using the difference equa-  
614 tions Eq. 3.
- 615 • We incorporate genetic drift by performing a binomial sampling based on  
616 the frequency after selection and the finite and fixed haploid population size  
617 ( $N_H$  for the host and  $N_P$  for the parasite).
- 618 • We allow for recurrent allele mutations (functional mutations) to take place  
619 and change genotypes from *RES* to *res* at rate  $\mu_{RtoR}$  or *res* to *RES* at rate  $\mu_{rtoR}$   
620 in the host and from *ninf* to *INF* at rate  $\mu_{ntoI}$  and from *INF* to *ninf* at rate  
621  $\mu_{Iton}$  in the parasite. We set all functional mutation rates to  $\mu_{Rtor} = \mu_{ntoI} =$   
622  $\mu_{rtoR} = \mu_{Iton} = 10^{-5}$ .

623 Note that the above mentioned steps are repeated twice for the parasite as there  
624 are two parasite generation per host generation. Once when going from parasite  
625 generation  $g, 1$  to  $g, 2$  and once when going from parasite generation  $g, 2$  to  $g+1, 1$ .  
626 Accordingly, the detailed calculations for each parasite generation are as follows:

- 627 1. The expected frequency of *INF*-parasites after selection  $a_x$  ( $x=g, 2$  or  $x=g+1, 1$ )  
628 is obtained by using the respective recursion equation in Eq. 3. The corre-  
629 sponding frequency of *ninf*-parasites is calculated as  $A_x = 1 - a_x$ .
- 630 2. The number of *INF*-parasite individuals after drift  $N_I$  is sampled from a  
631 Binomial distribution  $N_I \sim \mathcal{B}(N_P, a_x)$ . Thus, the number of *ninf*-parasites  
632 after drift is equal to  $N_n = N_P - N_I$ .
- 633 3. In order to include the functional mutations the following two samplings are  
634 performed:
  - 635 • the number of mutants  $M_{In}$  from *INF* to *ninf* is obtained by sampling  
636 from a Poisson distribution with rate  $\lambda = \mu_{Ion} \cdot N_I$ .
  - 637 • the number of mutants  $M_{nI}$  from *ninf* to *INF* is obtained by sampling  
638 from a Poisson distribution with rate  $\lambda = \mu_{nIoI} \cdot N_n$ .

639 Thus, the number of *INF*-parasites in generation  $x$  is given by:

$$N_{x,I} = N_I - M_{In} + M_{nI} \quad (S1)$$

640 And the frequency of *INF*-parasites at the beginning of generation  $x$  is equal to:

$$\frac{N_{x,I}}{N_P} \quad (S2)$$

641

642 The corresponding steps for the host population are as follows.

- 643 1. The expected frequency of *RES*-hosts after selection  $R_{g+1}$  is obtained by  
644 using difference equation Eq. 3. The frequency of *res*-hosts is calculated as

$$r_{g+1} = 1 - R_{g+1}.$$

2. The number of *RES*-host individuals after drift is sampled from a Binomial distribution  $N_R \sim \mathcal{B}(N_H, R_{g+1})$ . Thus, the number of *res*-host after drift is equal to  $N_r = N_H - N_R$ .

3. In order to include the functional mutations the following two samplings are performed:

- the number of mutants from *RES* to *res*  $M_{Rr}$  is obtained by sampling from a Poisson distribution with rate  $\lambda = \mu_{RtoR} \cdot N_R$ .
- the number of mutants from *res* to *RES*  $M_{rR}$  is obtained by sampling from a Poisson distribution with rate  $\lambda = \mu_{rtoR} \cdot N_r$ .

Thus, the number of *RES*-individuals in generation  $g + 1$  is given by:

$$N_{g+1,R} = N_R - M_{Rr} + M_{rR} \quad (\text{S3})$$

And the frequency of *RES*-hosts at the beginning of generation  $g + 1$  is equal to:

$$\frac{N_{g+1,R}}{N_H} \quad (\text{S4})$$

By repeating this procedure for  $g_{max} = 3 \cdot \max(N_H, N_P)$  generations we obtain the so called frequency path which consists of the frequencies of all four alleles at the beginning of each generation  $g$ . In order to constrain a modified version of msms (Ewing and Hermisson, 2010; Tellier et al., 2014) by this frequency path we rescale the generations  $g$  in the host to  $g_H^* = g/(2N_H)$  and in the parasite to  $g_P^* = g/(2N_P)$ . Note that msms is in diploid size. As  $N_H$  and  $N_P$  are haploid

663 population sizes this rescaling is equivalent to rescale time in units of  $4 \cdot N_{H,diploid}$   
 664 and  $4 \cdot N_{P,diploid}$ . Based on this time rescaled frequency path we launch msms once  
 665 for the host and once for the parasite.

## 666 S1.1.2. Fitness matrix

**Table S1:** Fitness matrix for **Model A** capturing the fitness effects of different interactions between host genotypes and parasites genotypes within a single host generation  $g$ .  $R_g$  ( $r_g$ ) denotes the frequency of resistant (susceptible) hosts in generation  $g$ .  $A_{g,1}$  ( $A_{g,2}$ ) denotes the frequency of non-infective parasites and  $a_{g,1}$  ( $a_{g,2}$ ) denotes the frequency of infective parasites at the beginning of the first (second) parasite generation  $t = 1$  ( $t = 2$ ) within host generation  $g$ . The costs are:  $c_H$ =cost of resistance,  $c_P$ =cost of infectivity,  $s_1$ ,  $s_2$ =cost of infection.

|                              |                  | first<br>generation | fitness $g, 1$ | second<br>generation | fitness $g, 2$ | host fitness         |
|------------------------------|------------------|---------------------|----------------|----------------------|----------------|----------------------|
| host genotype<br>$RES (R_g)$ | $ninf (A_{g,1})$ | 0                   |                | $ninf (A_{g,2})$     | 0              | $1 - c_H$            |
|                              | $ninf (A_{g,1})$ | 0                   |                | $INF (a_{g,2})$      | $1 - c_P$      | $(1 - c_H)(1 - s_2)$ |
|                              | $INF (a_{g,1})$  | $1 - c_P$           |                | $INF (a_{g,2})$      | $1 - c_P$      | $(1 - c_H)(1 - s_1)$ |
| host genotype<br>$res (r_g)$ | $ninf (A_{g,1})$ | 1                   |                | $ninf (A_{g,2})$     | 1              | $1 - s_1$            |
|                              | $INF (a_{g,1})$  | $1 - c_P$           |                | $INF (a_{g,2})$      | $1 - c_P$      | $1 - s_1$            |

## 667 S1.2. Model B

### 668 S1.2.1. Model description

669 **Model B** extends the basic model to  $T > 2$  parasite generations per host gener-  
 670 ation. As in the basic model the cost of infection  $s_t$  is a function of the parasite

generation  $t$  in which the host became infected and the maximum cost of infection  $s$ , which correspond to the cost of being infected at the first parasite generation  $t=1$  within host generation  $g$ . Upon infection a host stays infected until it reproduces and dies from natural death (at the end of the host generation  $g$ ). An infected host is reinfected by the offspring of the particular parasite for all subsequent parasite generations within host generation  $g$  (100% auto-infection). Hosts which have not been infected so far can be attacked by the offspring of any parasite type at the beginning of each parasite generation  $t$ . Whether this interaction subsequently results in an infection depends on the infection matrix. The recursion equations for this model are given by:

$$a_{g,t+1} = \frac{(1 - c_p) \left[ a_{g,1} + \sum_{l=2}^t a_{g,l} R_g \prod_{m=1}^{l-1} A_{g,m} \right]}{(1 - c_p) \left[ a_{g,1} + \sum_{l=2}^t a_{g,l} R_g \prod_{m=1}^{l-1} A_{g,m} \right] + A_{g,1} r_g} \quad (\text{S5a})$$

$$a_{g+1,1} = \frac{(1 - c_p) \left[ a_{g,1} + \sum_{l=2}^T a_{g,l} R_g \prod_{m=1}^{l-1} A_{g,m} \right]}{(1 - c_p) \left[ a_{g,1} + \sum_{l=2}^T a_{g,l} R_g \prod_{m=1}^{l-1} A_{g,m} \right] + A_{g,1} r_g} \quad (\text{S5b})$$

$$a_{g,2} = \frac{(1 - c_p) \cdot a_{g,1}}{(1 - c_p) a_{g,1} + A_{g,1} r_g} \quad (\text{S5c})$$

$$R_{g+1} = \frac{R_g \cdot (1 - c_H) \left( (1 - s_1) a_{g,1} + \sum_{t=2}^T \left( (1 - s_t) a_{g,t} \prod_{l=1}^{t-1} A_{g,l} \right) + \prod_{t=1}^T A_{g,t} \right)}{R_g \cdot (1 - c_H) \left( (1 - s_1) a_{g,1} + \sum_{t=2}^T \left( (1 - s_t) a_{g,t} \prod_{l=1}^{t-1} A_{g,l} \right) + \prod_{t=1}^T A_{g,t} \right) + r_g (1 - s_1)} \quad (\text{S5d})$$

Note that in this side analysis, genetic drift and functional mutations are only taken into account when going from host generation  $g$  to host generation  $g + 1$  in both, the host and the parasite. The frequency path in the parasite which is used to launch msms consists of the frequencies at the first parasite generation within host generation  $g$ . Time is rescaled as  $g_p^* = g/(2N_p)$  in the parasite.

### 686 *S1.3. Model C*

#### 687 *S1.3.1. Model description*

688 **Model C** is based on Model C in Tellier and Brown (2007). As in model A,  
 689 we assume  $T = 2$  discrete parasite generations per discrete host generation  $g$   
 690 and frequency-dependent disease transmission. Parasites of the second ( $t = 2$ )  
 691 generation within host generation  $g$  infect the same host individual as their parent  
 692 at rate  $\psi$  (auto-infection) or a different host at rate  $1 - \psi$  (allo-infection). A host  
 693 which is infected throughout the whole host generation  $g$  loses the amount  $s_1 = s$   
 694 (cost of infection) of its fitness. If it is only infected during a single parasite  
 695 generation the cost of infection reduces to  $s_2 = \frac{s}{2}$ . The respective fitness matrix  
 696 is shown in table S2 with  $A_{g,t}$  ( $a_{g,t}$ ) denoting the frequency of *ninf* (*INF*)-parasites  
 697 in the  $t$ -th parasite generation within host generation  $g$  and  $R_g$  ( $r_g$ ) denoting the  
 698 frequency of *RES* (*res*)-hosts in host generation  $g$ .

$$a_{g,2} = \frac{a_{g,1} \cdot (1 - c_p)}{a_{g,1} \cdot (1 - c_p) + A_{g,1} \cdot r_g} \quad (\text{S6a})$$

$$a_{g+1,1} = \frac{(1 - c_p) \cdot (R_g A_{g,1} a_{g,2} + r_g A_{g,1} a_{g,2} (1 - \psi) + a_{g,1} [\psi + a_{g,2} (1 - \psi)])}{r_g \cdot (\psi A_{g,1} + A_{g,2} (1 - \psi)) + (1 - c_p) \cdot (R_g A_{g,1} a_{g,2} + r_g A_{g,1} a_{g,2} (1 - \psi) + a_{g,1} [\psi + a_{g,2} (1 - \psi)])} \quad (\text{S6b})$$

$$R_{g+1} = \frac{R_g \cdot (1 - c_H) (A_{g,1} A_{g,2} + (1 - s_2) (A_{g,1} a_{g,2} + a_{g,1} A_{g,2} (1 - \psi)) + (1 - s_1) (a_{g,1} \psi + a_{g,1} a_{g,2} (1 - \psi)))}{R_g \cdot (1 - c_H) (A_{g,1} A_{g,2} + (1 - s_2) (A_{g,1} a_{g,2} + a_{g,1} A_{g,2} (1 - \psi)) + (1 - s_1) (a_{g,1} \psi + a_{g,1} a_{g,2} (1 - \psi))) + r_g (1 - s_1)} \quad (\text{S6c})$$

699 The allele frequency path for this model is obtained in the same way as in **Model**

700 **A.**

701 *SI.3.2. Fitness matrix*

**Table S2:** Fitness matrix for **Model C** capturing the fitness effects of different interactions between hosts and parasites within a single host generation  $g$ .  $R_g$  ( $r_g$ ) denotes the frequency of resistant (susceptible) hosts in generation  $g$ .  $A_{g,1}$  ( $A_{g,2}$ ) denotes the frequency of non-infective parasites and  $a_{g,1}$  ( $a_{g,2}$ ) denotes the frequency of infective parasites at the beginning of the first (second) parasite generation  $t = 1$  ( $t = 2$ ) within host generation  $g$ .  $n/a$  indicates that these hosts have not been infected as *ninf*-parasites fail to infect *RES*-hosts. The costs are:  $c_H$ =cost of resistance,  $c_P$ =cost of infectivity,  $s_1$ ,  $s_2$ =costs of infection.

|                                    | first<br>generation       | auto-infection ( $\psi$ )<br>allo-infection ( $1 - \psi$ ) | second<br>generation      | fitness of<br>second parasite<br>generation | host fitness         |
|------------------------------------|---------------------------|------------------------------------------------------------|---------------------------|---------------------------------------------|----------------------|
| host genotype <i>RES</i> ( $R_g$ ) | <i>ninf</i> ( $A_{g,1}$ ) | n/a                                                        | <i>ninf</i> ( $A_{g,2}$ ) | 0                                           | $1 - c_H$            |
|                                    |                           |                                                            | <i>INF</i> ( $a_{g,2}$ )  | $1 - c_P$                                   | $(1 - c_H)(1 - s_2)$ |
|                                    | <i>INF</i> ( $a_{g,1}$ )  | $\psi$                                                     | <i>INF</i> ( $a_{g,2}$ )  | $1 - c_P$                                   | $(1 - c_H)(1 - s_1)$ |
|                                    |                           | $1 - \psi$                                                 | <i>INF</i> ( $a_{g,2}$ )  | $1 - c_P$                                   | $(1 - c_H)(1 - s_1)$ |
| host genotype <i>res</i> ( $r_g$ ) | <i>ninf</i> ( $A_{g,1}$ ) | $1 - \psi$                                                 | <i>ninf</i> ( $A_{g,2}$ ) | 0                                           | $(1 - c_H)(1 - s_2)$ |
|                                    |                           | $\psi$                                                     | <i>ninf</i> ( $A_{g,2}$ ) | 1                                           | $1 - s_1$            |
|                                    |                           | $1 - \psi$                                                 | <i>ninf</i> ( $A_{g,2}$ ) | 1                                           | $1 - s_1$            |
|                                    | <i>INF</i> ( $a_{g,1}$ )  | $1 - \psi$                                                 | <i>INF</i> ( $a_{g,2}$ )  | $1 - c_P$                                   | $1 - s_1$            |
|                                    |                           | $\psi$                                                     | <i>INF</i> ( $a_{g,2}$ )  | $1 - c_P$                                   | $1 - s_1$            |
|                                    |                           | $1 - \psi$                                                 | <i>INF</i> ( $a_{g,2}$ )  | $1 - c_P$                                   | $1 - s_1$            |
|                                    |                           | $1 - \psi$                                                 | <i>ninf</i> ( $A_{g,2}$ ) | 1                                           | $1 - s_1$            |

## 702 S2. Pairwise Manhattan Distance (PMD)

*PMD* is calculated as the sum of manhattan distances between class  $i$  in the host site frequency spectrum and class  $i$  in the parasite site frequency spectrum. It is calculated as:

$$PMD = \sum_{i=1}^{n-1} |\xi_{H,i} - \xi_{P,i}| \quad (S1)$$

703 with  $\xi_{H,i}$  ( $\xi_{P,i}$ ) being the total number of neutral SNPs linked to the coevolving  
704 locus which are in frequency class  $i$  of the unfolded site frequency spectrum of  
705 the host (parasite). Note that in the current formulation the summary statistic  
706 relies on the sample size of the host ( $n_H$ ) and the parasite ( $n_P$ ) being the same.  
707 However it is possible to adjust this summary statistic by downsampling the site  
708 frequency spectrum of the species with the higher sample size.

## 709 S3. Supplementary tables

**Table S3:** Approximate frequencies of resistant hosts ( $\hat{R}$ ) and infective parasites ( $\hat{a}$ ) at the non-trivial internal equilibrium point in **Model A** (Eq. 4) for various combinations of cost of resistance ( $c_H$ ), cost of infectivity ( $c_P$ ) and cost of infection ( $s$ ) as plotted in Fig. 1.

| panel of Fig. 1 | $c_H$ | $c_P$ | $s_1$ | $s_2$ | $\hat{a}$ | $\hat{R}$ |
|-----------------|-------|-------|-------|-------|-----------|-----------|
| a               | 0.05  | 0.10  | 0.20  | 0.10  | 0.667     | 0.081     |
| a               | 0.05  | 0.10  | 0.30  | 0.15  | 0.775     | 0.089     |
| a               | 0.05  | 0.10  | 0.40  | 0.20  | 0.835     | 0.094     |
| a               | 0.05  | 0.10  | 0.50  | 0.25  | 0.873     | 0.097     |
| a               | 0.05  | 0.10  | 0.60  | 0.30  | 0.899     | 0.100     |
| a               | 0.05  | 0.10  | 0.70  | 0.35  | 0.919     | 0.102     |
| a               | 0.05  | 0.10  | 0.80  | 0.40  | 0.934     | 0.104     |

|   |      |      |      |      |       |       |
|---|------|------|------|------|-------|-------|
| b | 0.10 | 0.10 | 0.20 | 0.10 | 0.424 | 0.068 |
| b | 0.10 | 0.10 | 0.30 | 0.15 | 0.603 | 0.077 |
| b | 0.10 | 0.10 | 0.40 | 0.20 | 0.704 | 0.084 |
| b | 0.10 | 0.10 | 0.50 | 0.25 | 0.771 | 0.089 |
| b | 0.10 | 0.10 | 0.60 | 0.30 | 0.818 | 0.092 |
| b | 0.10 | 0.10 | 0.70 | 0.35 | 0.853 | 0.096 |
| b | 0.10 | 0.10 | 0.80 | 0.40 | 0.881 | 0.098 |
|   |      |      |      |      |       |       |
| c | 0.05 | 0.30 | 0.20 | 0.10 | 0.667 | 0.291 |
| c | 0.05 | 0.30 | 0.30 | 0.15 | 0.775 | 0.324 |
| c | 0.05 | 0.30 | 0.40 | 0.20 | 0.835 | 0.347 |
| c | 0.05 | 0.30 | 0.50 | 0.25 | 0.873 | 0.363 |
| c | 0.05 | 0.30 | 0.60 | 0.30 | 0.899 | 0.375 |
| c | 0.05 | 0.30 | 0.70 | 0.35 | 0.919 | 0.384 |
| c | 0.05 | 0.30 | 0.80 | 0.40 | 0.934 | 0.392 |
|   |      |      |      |      |       |       |
| d | 0.10 | 0.30 | 0.20 | 0.10 | 0.424 | 0.235 |
| d | 0.10 | 0.30 | 0.30 | 0.15 | 0.603 | 0.273 |
| d | 0.10 | 0.30 | 0.40 | 0.20 | 0.704 | 0.301 |
| d | 0.10 | 0.30 | 0.50 | 0.25 | 0.771 | 0.323 |
| d | 0.10 | 0.30 | 0.60 | 0.30 | 0.818 | 0.340 |
| d | 0.10 | 0.30 | 0.70 | 0.35 | 0.853 | 0.354 |
| d | 0.10 | 0.30 | 0.80 | 0.40 | 0.881 | 0.366 |

**Table S4:** Overview of all parameters and variables used in this paper.

| name  | standard<br>value | Description        |
|-------|-------------------|--------------------|
| $c_H$ | 0.05              | cost of resistance |

**Tab. S4 Continued:**

|                 |           |                                                                                                                    |
|-----------------|-----------|--------------------------------------------------------------------------------------------------------------------|
| $s$             | 0.3       | cost of infection                                                                                                  |
| $c_P$           | 0.10      | cost of virulence                                                                                                  |
| $\psi$          | 1         | auto-infection rate                                                                                                |
| $R_0$           | 0.20      | initial frequency of <i>RES</i> -hosts                                                                             |
| $a_0$           | 0.20      | initial frequency of <i>INF</i> -parasites                                                                         |
| $R_g$           |           | frequency of <i>RES</i> -hosts in generation $g$                                                                   |
| $r_g$           |           | frequency of <i>res</i> -hosts in generation $g$                                                                   |
| $A_{g,t}$       |           | frequency of <i>ninf</i> -parasites at the beginning of the $t$ -th parasite generation within host generation $g$ |
| $a_{g,t}$       |           | frequency of <i>INF</i> -parasites at the beginning of the $t$ -th parasite generation within host generation $g$  |
| $g_{max}$       | 30,000    | number of host generations to simulate                                                                             |
| $T$             | 2         | number of parasite generations within host generation $g$                                                          |
| $g$             | -         | counter for host generations                                                                                       |
| $t$             | -         | counter for parasite generations within host generation $g$                                                        |
| $n_H$           | 50        | sample size host                                                                                                   |
| $n_P$           | 50        | sample size parasite                                                                                               |
| $N_H$           | 10,000    | haploid host population size                                                                                       |
| $N_P$           | 10,000    | haploid parasite population size                                                                                   |
| $\theta_H$      | 5         | neutral population mutation rate host                                                                              |
| $\theta_P$      | 5         | neutral population mutation rate parasite                                                                          |
| $\mu_{Rtor}$    | $10^{-5}$ | mutation rate <i>RES</i> to <i>res</i>                                                                             |
| $\mu_{rtoR}$    | $10^{-5}$ | mutation rate <i>res</i> to <i>RES</i>                                                                             |
| $\mu_{ntoI}$    | $10^{-5}$ | mutation rate <i>ninf</i> to <i>INF</i>                                                                            |
| $\mu_{Iton}$    | $10^{-5}$ | mutation rate <i>INF</i> to <i>ninf</i>                                                                            |
| $\mu_{neutral}$ | $10^{-7}$ | neutral mutation rate per bp                                                                                       |
| $N_R$           |           | number of <i>RES</i> -hosts after selection and genetic drift                                                      |
| $N_r$           |           | number of <i>res</i> -hosts after selection and genetic drift                                                      |
| $N_n$           |           | number of <i>ninf</i> -parasites after selection and genetic drift                                                 |

**Tab. S4 Continued:**

|             |                                                                   |
|-------------|-------------------------------------------------------------------|
| $N_I$       | number of <i>INF</i> -parasites after selection and genetic drift |
| $M_{Rr}$    | current number of mutants from <i>RES</i> to <i>res</i>           |
| $M_{rR}$    | current number of mutants from <i>res</i> to <i>RES</i>           |
| $M_{nI}$    | current number of mutants from <i>ninf</i> to <i>INF</i>          |
| $M_{In}$    | current number of mutants from <i>INF</i> to <i>ninf</i>          |
| $N_{g+1,R}$ | number of <i>RES</i> -hosts in host generation $g + 1$            |
| $N_{x,I}$   | number of <i>INF</i> -parasites in parasite generation $x$        |

**Table S5:** Summary statistics calculated for the pseudo-observed data sets

| Summary statistic               | reference              |
|---------------------------------|------------------------|
| number of segregating sites $S$ | (Watterson, 1975)      |
| $\theta_W$                      | (Watterson, 1975)      |
| nucleotide diversity $\pi$      | (Nei and Tajima, 1981) |
| Tajimas' D                      | (Tajima, 1989)         |
| Fu and Li's D                   | (Fu and Li, 1993)      |
| Fu and Li's F                   | (Fu and Li, 1993)      |
| $\theta_H$                      | (Fay and Wu, 2000)     |
| Hprime                          | (Zeng et al., 2006)    |
| PMD                             |                        |

**Table S6:** Settings which have been used for running Approximate Bayesian Computation for the different scenarios and number of repetitions.

| Scenario $S$ | nb repetitions $r$ | information used | 'known' parameters                                                       | inferred parameters | prior distribution              | complex parameters                  |
|--------------|--------------------|------------------|--------------------------------------------------------------------------|---------------------|---------------------------------|-------------------------------------|
| $S = 1$      | 200                | host + parasite  | model A, $c_H = 0.05$ , $c_P = 0.10$ , $T = 2$ , $\psi = 1$              | $s$                 | $\text{unif}(0.1, 0.9)$         | $\theta_H = N_H/1000$               |
|              |                    |                  |                                                                          | $N_H$               | $\text{logunif}(2, 000, 20000)$ | $\theta_P = N_P/1000$               |
|              |                    |                  |                                                                          | $N_P$               | $\text{logunif}(2, 000, 20000)$ | $g_{\max} = 3 \cdot \max(N_H, N_P)$ |
| $S = 1$      | 200                | host             | model A, $c_H = 0.05$ , $c_P = 0.10$ , $T = 2$                           | $s$                 | $\text{unif}(0.1, 0.9)$         | $\theta_H = N_H/1000$               |
|              |                    |                  |                                                                          | $N_H$               | $\text{logunif}(2, 000, 20000)$ | $\theta_P = N_P/1000$               |
|              |                    |                  |                                                                          | $N_P$               | $\text{logunif}(2, 000, 20000)$ | $g_{\max} = 3 \cdot \max(N_H, N_P)$ |
| $S = 1$      | 200                | parasite         | model A, $c_H = 0.05$ , $c_P = 0.10$ , $T = 2$                           | $s$                 | $\text{unif}(0.1, 0.9)$         | $\theta_H = N_H/1000$               |
|              |                    |                  |                                                                          | $N_H$               | $\text{logunif}(2, 000, 20000)$ | $\theta_P = N_P/1000$               |
|              |                    |                  |                                                                          | $N_P$               | $\text{logunif}(2, 000, 20000)$ | $g_{\max} = 3 \cdot \max(N_H, N_P)$ |
| $S = 1$      | 10                 | host + parasite  | model A, $c_H = 0.05$ , $c_P = 0.10$ , $T = 2$                           | $s$                 | $\text{unif}(0.1, 0.9)$         | $\theta_H = N_H/1000$               |
|              |                    |                  |                                                                          | $N_H$               | $\text{logunif}(2, 000, 20000)$ | $\theta_P = N_P/1000$               |
|              |                    |                  |                                                                          | $N_P$               | $\text{logunif}(2, 000, 20000)$ | $g_{\max} = 3 \cdot \max(N_H, N_P)$ |
| $S = 1$      | 10                 | host             | model A, $c_H = 0.05$ , $c_P = 0.10$ , $T = 2$                           | $s$                 | $\text{unif}(0.1, 0.9)$         | $\theta_H = N_H/1000$               |
|              |                    |                  |                                                                          | $N_H$               | $\text{logunif}(2, 000, 20000)$ | $\theta_P = N_P/1000$               |
|              |                    |                  |                                                                          | $N_P$               | $\text{logunif}(2, 000, 20000)$ | $g_{\max} = 3 \cdot \max(N_H, N_P)$ |
| $S = 1$      | 10                 | parasite         | model A, $c_H = 0.05$ , $c_P = 0.10$ , $T = 2$                           | $s$                 | $\text{unif}(0.1, 0.9)$         | $\theta_H = N_H/1000$               |
|              |                    |                  |                                                                          | $N_H$               | $\text{logunif}(2, 000, 20000)$ | $\theta_P = N_P/1000$               |
|              |                    |                  |                                                                          | $N_P$               | $\text{logunif}(2, 000, 20000)$ | $g_{\max} = 3 \cdot \max(N_H, N_P)$ |
| $S = 2$      | 200                | host + parasite  | model A, $N_H = 10,000$ , $N_P = 10,000$ , $T = 2$ , $g_{\max} = 30,000$ | $s$                 | $\text{unif}(0.1, 0.9)$         | -                                   |
|              |                    |                  |                                                                          | $c_H$               | $\text{unif}(0.01, 0.35)$       | -                                   |
|              |                    |                  |                                                                          | $c_P$               | $\text{unif}(0.01, 0.35)$       | -                                   |
| $S = 2$      | 200                | host             | model A, $N_H = 10,000$ , $N_P = 10,000$ , $T = 2$ , $g_{\max} = 30,000$ | $s$                 | $\text{unif}(0.1, 0.9)$         | -                                   |
|              |                    |                  |                                                                          | $c_H$               | $\text{unif}(0.01, 0.35)$       | -                                   |
|              |                    |                  |                                                                          | $c_P$               | $\text{unif}(0.01, 0.35)$       | -                                   |
| $S = 2$      | 200                | parasite         | model A, $N_H = 10,000$ , $N_P = 10,000$ , $T = 2$ , $g_{\max} = 30,000$ | $s$                 | $\text{unif}(0.1, 0.9)$         | -                                   |
|              |                    |                  |                                                                          | $c_H$               | $\text{unif}(0.01, 0.35)$       | -                                   |
|              |                    |                  |                                                                          | $c_P$               | $\text{unif}(0.01, 0.35)$       | -                                   |
| $S = 2$      | 10                 | host + parasite  | model A, $N_H = 10,000$ , $N_P = 10,000$ , $T = 2$ , $g_{\max} = 30,000$ | $s$                 | $\text{unif}(0.1, 0.9)$         | -                                   |
|              |                    |                  |                                                                          | $c_H$               | $\text{unif}(0.01, 0.35)$       | -                                   |
|              |                    |                  |                                                                          | $c_P$               | $\text{unif}(0.01, 0.35)$       | -                                   |
| $S = 2$      | 10                 | host             | model A, $N_H = 10,000$ , $N_P = 10,000$ , $T = 2$ , $g_{\max} = 30,000$ | $s$                 | $\text{unif}(0.1, 0.9)$         | -                                   |
|              |                    |                  |                                                                          | $c_H$               | $\text{unif}(0.01, 0.35)$       | -                                   |
|              |                    |                  |                                                                          | $c_P$               | $\text{unif}(0.01, 0.35)$       | -                                   |
| $S = 2$      | 10                 | parasite         | model A, $N_H = 10,000$ , $N_P = 10,000$ , $T = 2$ , $g_{\max} = 30,000$ | $s$                 | $\text{unif}(0.1, 0.9)$         | -                                   |
|              |                    |                  |                                                                          | $c_H$               | $\text{unif}(0.01, 0.35)$       | -                                   |
|              |                    |                  |                                                                          | $c_P$               | $\text{unif}(0.01, 0.35)$       | -                                   |

# 710 S4. Supplementary figures

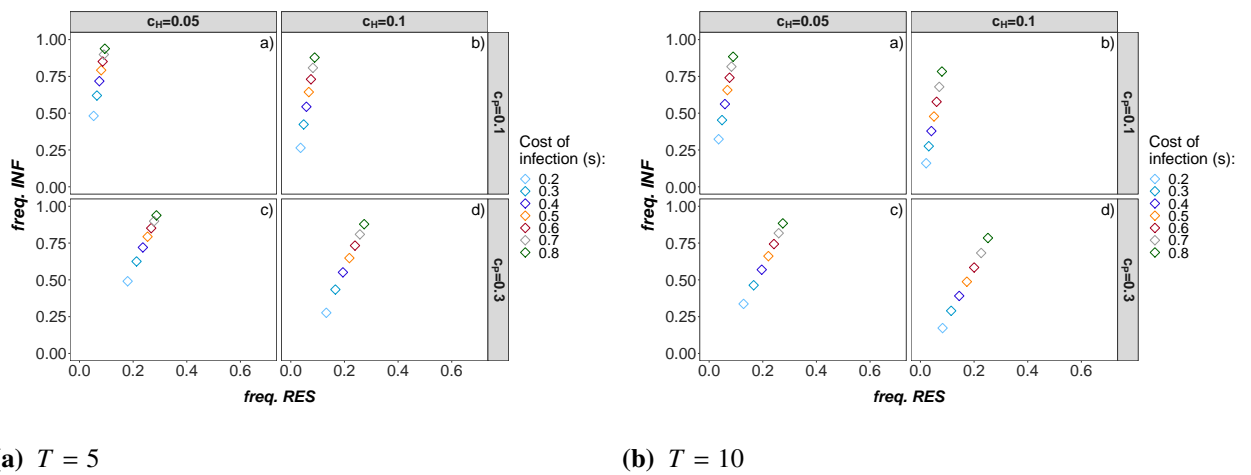

**Figure S1:** Deterministic equilibrium frequencies for **Model B** for a)  $T = 5$  parasite generations (left) and b)  $T = 10$  parasite generations (right) per host generation. The equilibrium frequencies for different combinations of cost of resistance  $c_H = (0.05, 0.1)$  (columns), cost of infectivity  $c_P = (0.1, 0.3)$  (rows) and cost of infection  $s = (0.2, 0.3, 0.4, 0.5, 0.6, 0.7, 0.8)$  (color of the squares) are shown. Only combinations with trench-warfare dynamics are shown. Centres of the squares represent the equilibrium frequencies obtained by simulating numerically the recursion equations in Eq. S5 for  $g_{max} = 30,000$  host generations starting with an initial frequency of  $R_0 = 0.2$  resistant hosts and  $a_0 = 0.2$  infective parasites.

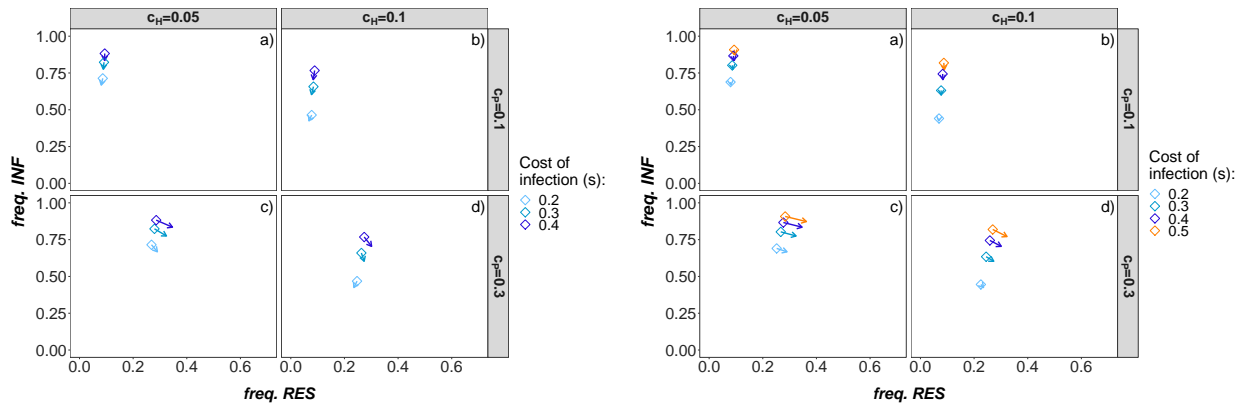

(a)  $\psi = 0.75$

(b)  $\psi = 0.95$

**Figure S2:** Deterministic equilibrium frequencies for **Model C** (auto-allo-infection model) with  $T = 2$  parasite generations per host generation for two different autoinfection rates  $\psi = 0.75$  (left) and  $\psi = 0.95$  (right). The equilibrium frequencies for different combinations of cost of resistance  $c_H = (0.05, 0.1)$  (columns), cost of infectivity  $c_P = (0.1, 0.3)$  (rows) and cost of infection  $s = (0.2, 0.3, 0.4, 0.5, 0.6, 0.7, 0.8)$  (color of the squares) are shown. Only combinations which result in trench-warfare dynamics are plotted. Centres of the squares represent the equilibrium frequencies obtained by simulating numerically the recursion equations in Eq. S6 for  $g_{max} = 30,000$  host generations starting with an initial frequency of  $R_0 = 0.2$  resistant hosts and  $a_0 = 0.2$  infective parasites. Heads of the arrows represent the equilibrium frequencies based on Eq. 4 which corresponds to the case  $\psi = 1$  (Tellier and Brown, 2007).

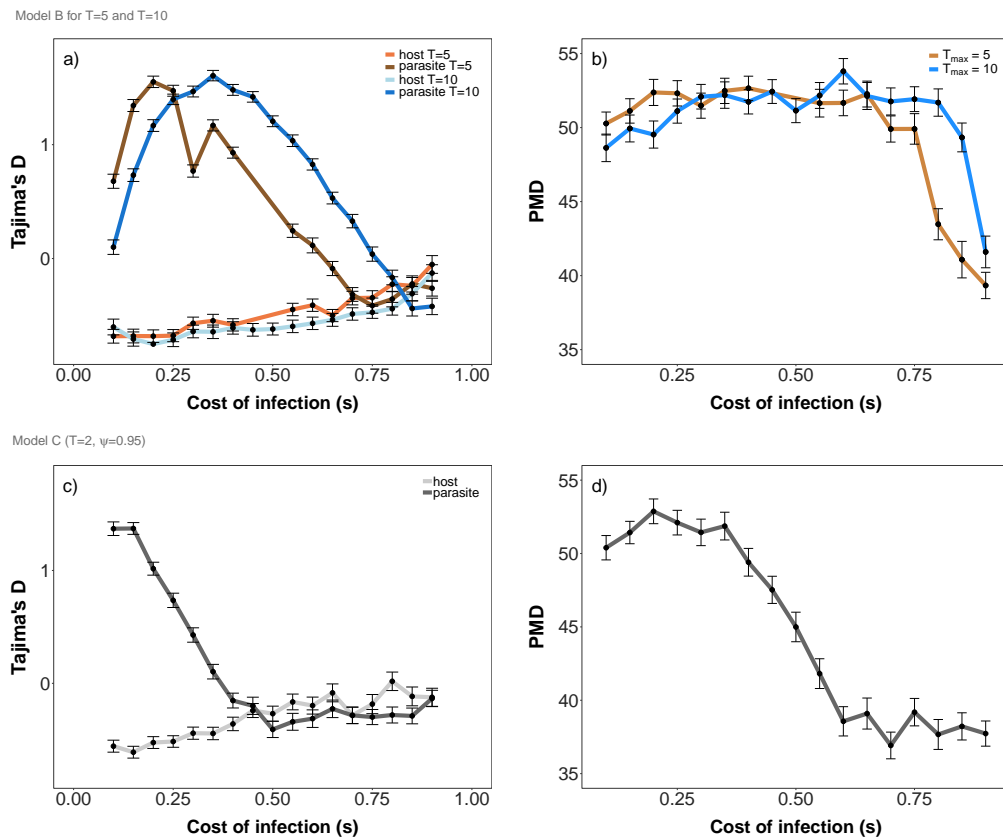

**Figure S3:** Mean and standard error of Tajima's D (a+c) and pairwise manhattan distance (PMD) (b+d) for various costs of infection  $s$  (x-axis) and  $r = 200$  repetitions. Results for **Model B** (pure autoinfection model with  $T = 5$  and  $T = 10$ ) are shown at the top, results for **Model C** (auto-allo-infection model with  $\psi = 0.95$ ) are shown at the bottom. The other parameters are fixed to:  $c_H = 0.05$  and  $c_P = 0.1$ . Initial frequencies  $R_0$  and  $a_0$  in  $a$  and  $b$  are chosen randomly from a uniform distribution between 0 and 1 while  $R_0 = a_0 = 0.2$  in  $c$  and  $d$ .

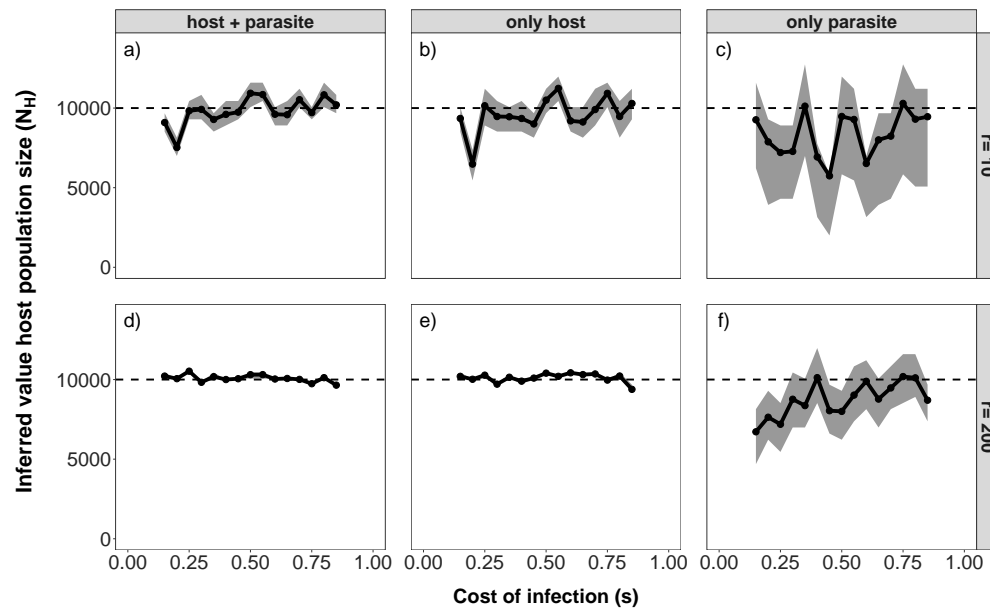

**Figure S4:** Median of the posterior distribution (y-axis) for the host population size  $N_H$  against the true cost of infection  $s$  for  $r = 10$  (top, a-c) and  $r = 200$  (bottom, d-f). The inference results for scenario 1 based on host and parasite polymorphism data (left, a+d), host polymorphism data only (middle, b+e) and parasite polymorphism data only (right, c+f) are shown. The true host population size is always  $N_H = 10,000$  as indicated by the dashed horizontal line. The chosen parameters are:  $c_H = 0.05$ ,  $c_P = 0.1$ , functional mutation rates  $= 10^{-5}$ ,  $c_H = 0.05$ ,  $c_P = 0.1$ ,  $g_{max} = 30,000$ ,  $\theta_H = 5$ ,  $\theta_P = 5$ ,  $n_H = 50$  and  $n_P = 50$ . Priors have been chosen as follows:  $N_H$  log uniform(2000, 40000),  $N_P$  log uniform(2000, 40000),  $s$  uniform(0.1, 0.9).  $s$ ,  $N_H$  and  $N_P$  are inferred simultaneously for all plots.

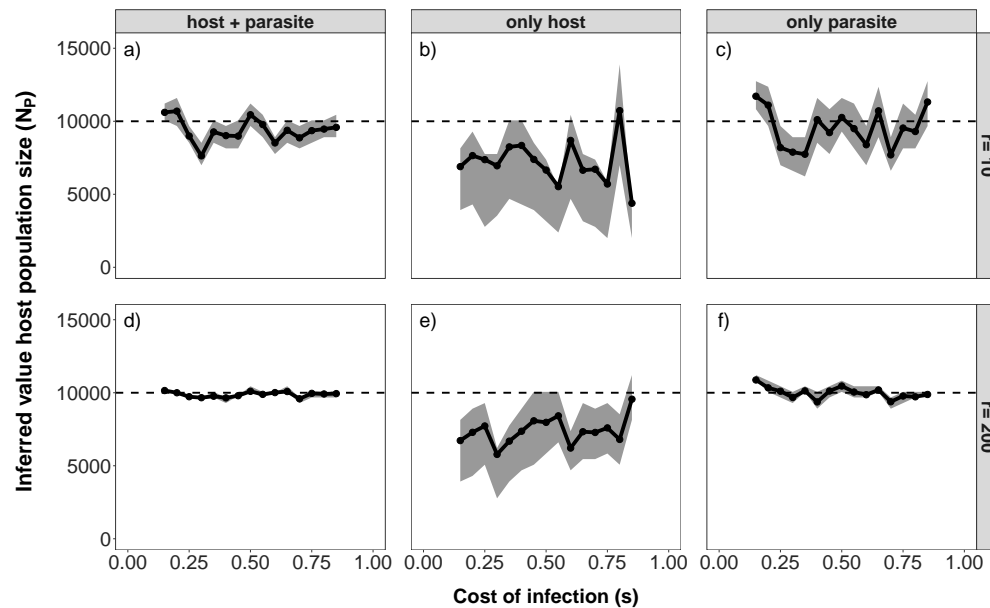

**Figure S5:** Median of the posterior distribution (y-axis) for the parasite population size  $N_P$  against the true cost of infection  $s$  for  $r = 10$  (top, a-c) and  $r = 200$  (bottom, d-f). The inference results for scenario 1 based on host and parasite polymorphism data (left, a+d), host polymorphism data only (middle, b+e) and parasite polymorphism data only (right, c+f) are shown. The true parasite population size is always  $N_P = 10,000$  as indicated by the dashed horizontal line. The chosen parameters are:  $c_H = 0.05$ ,  $c_P = 0.1$ , functional mutation rates  $= 10^{-5}$ ,  $c_H = 0.05$ ,  $c_P = 0.1$ ,  $g_{max} = 30,000$ ,  $\theta_H = 5$ ,  $\theta_P = 5$ ,  $n_H = 50$  and  $n_P = 50$ . Priors have been chosen as follows:  $N_H$  log uniform(2000, 40000),  $N_P$  log uniform(2000, 40000),  $s$  uniform(0.1, 0.9).  $s$ ,  $N_H$  and  $N_P$  are inferred simultaneously for all plots.

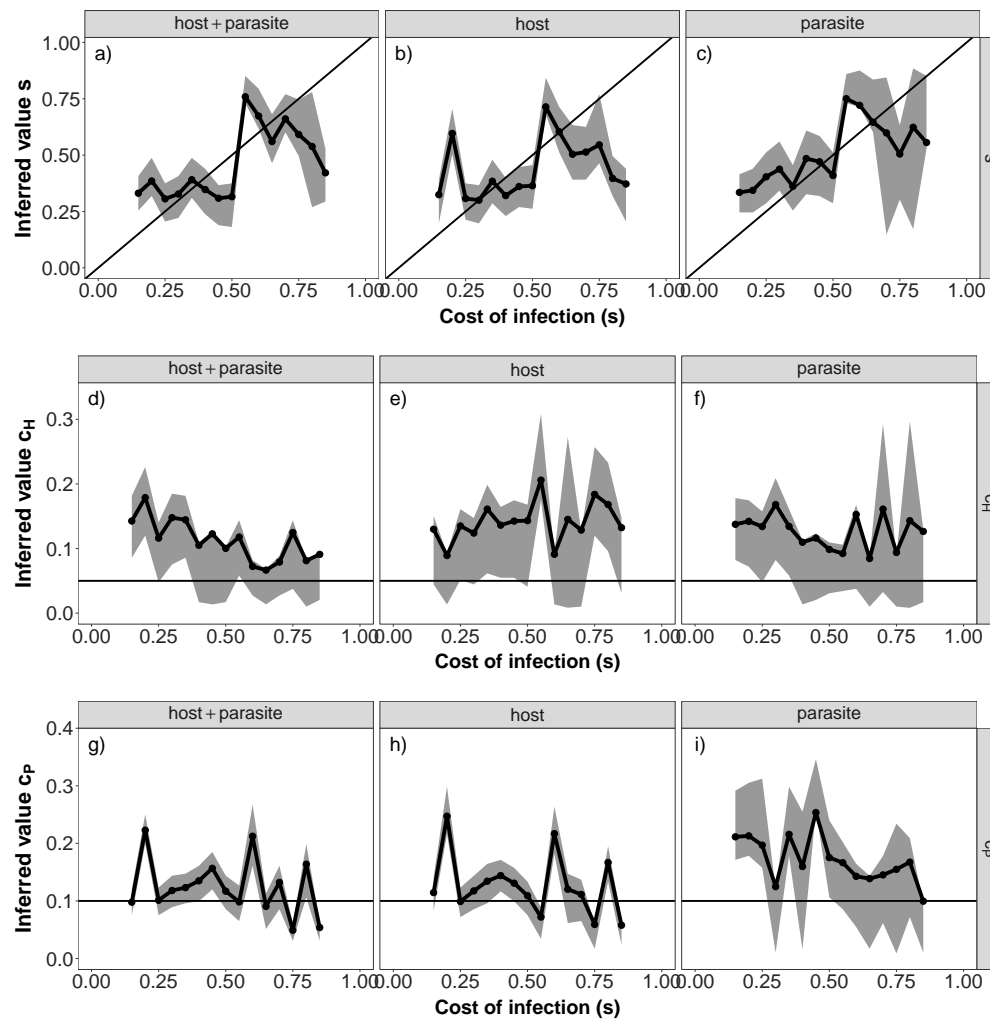

**Figure S6:** Median of the posterior distribution (y-axis) for the cost of infection  $s$  (a-c), cost of resistance  $c_H$  (d-f) and cost of infectivity  $c_P$  (g-i) compared to the true values (x-axis) for  $r = 10$ . The results are shown for inference based on host and parasite polymorphism data (left, a+d+g), host polymorphism data only (middle, b+e+h) and parasite polymorphism data only (right, c+f+i). The fixed parameters are chosen as:  $N_H = N_P = 10,000$ ,  $\mu_{Rtor} = \mu_{ntoI} = \mu_{rtoR} = \mu_{Iton} = 10^{-5}$ ,  $g_{max} = 30,000$ ,  $\theta_H = 5$ ,  $\theta_P = 5$ ,  $n_H = 50$  and  $n_P = 50$ . Priors have been chosen as follows:  $s$  uniform(0.1, 0.9),  $c_H$  uniform(0.01, 0.35),  $c_P$  uniform(0.01, 0.35).  $s$ ,  $c_H$  and  $c_P$  are inferred simultaneously for all plots.

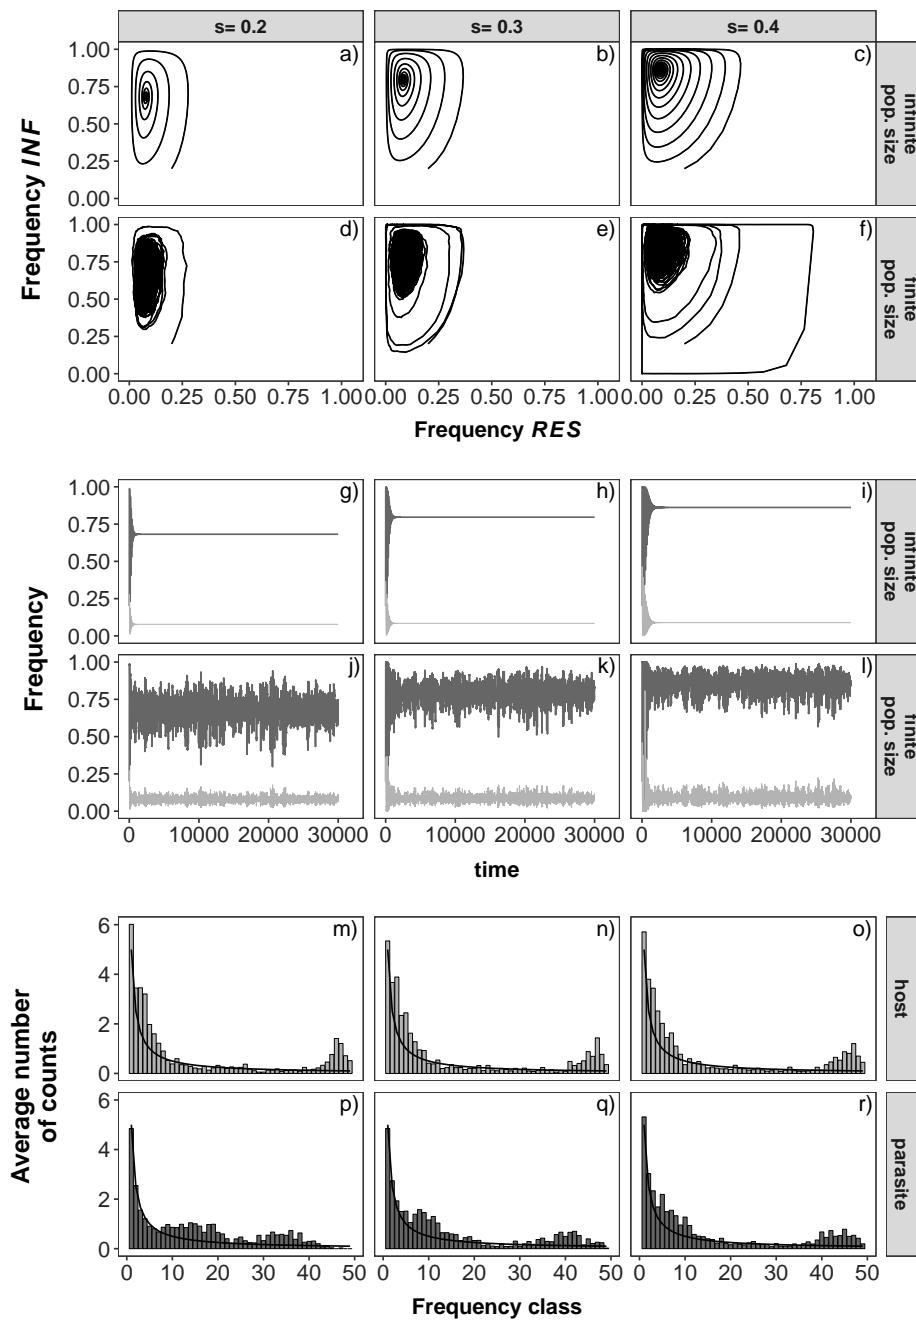

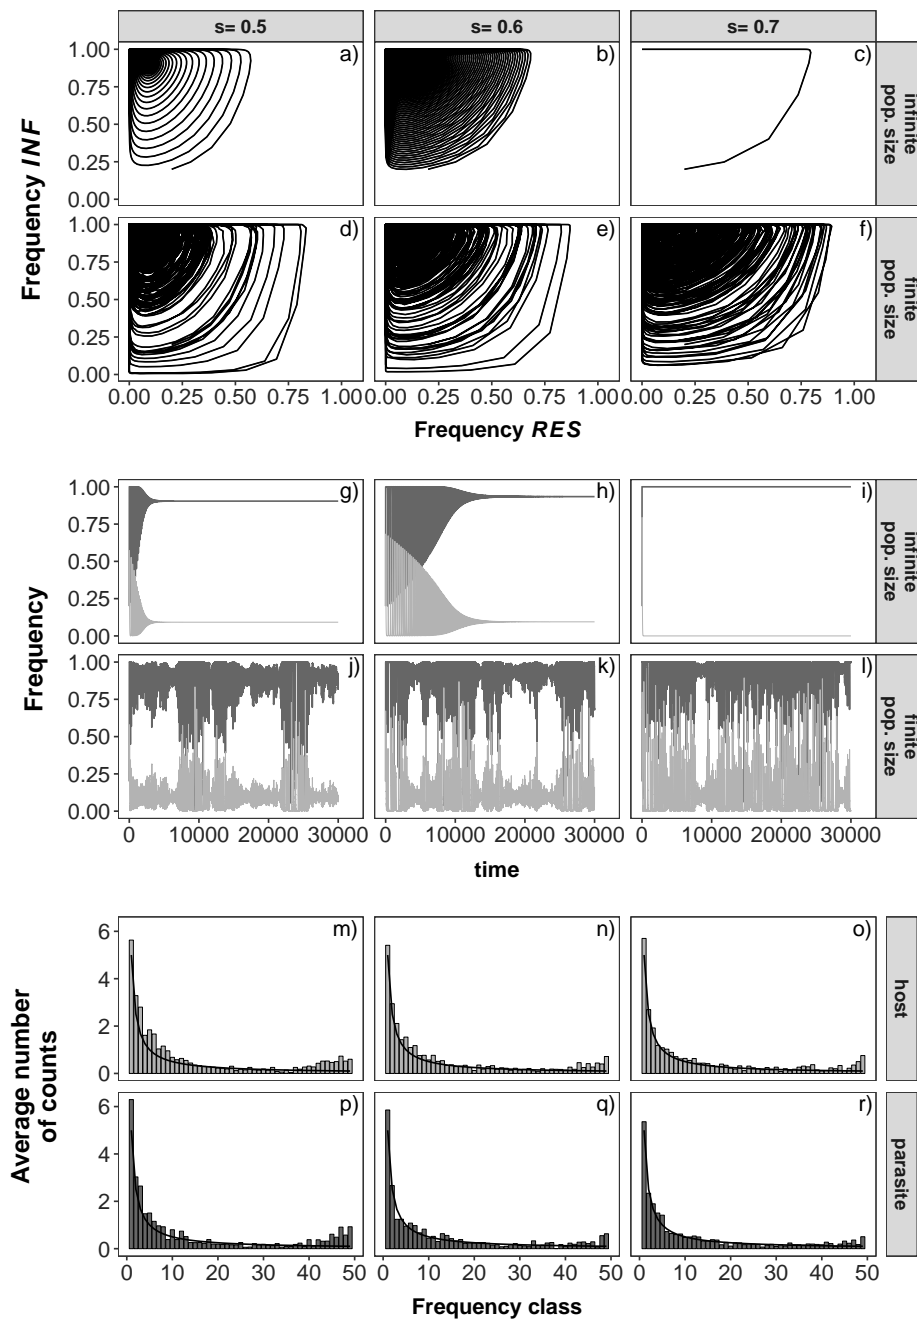

**Figure S7:** Influence of the cost of infection ( $s$ ) on the coevolutionary dynamics and genomic signatures in **Model A**. The subfigures show the allele frequency trajectory in infinite population size (a-c, g-i), one exemplary allele frequency path in finite population size which takes genetic drift and functional mutations into account (d-f, j-l), the average unfolded host site frequency spectrum of  $r = 200$  repetitions (m-o) and the average unfolded parasite site frequency spectrum of  $r = 200$  repetitions (p-r).

In subfigures a-f each dot represents the frequency of resistant (*RES*) hosts (x-axis) and infective (*INF*) parasites (y-axis) at the beginning of a single host generation  $g$ . The same information is displayed in a slightly different way in subfigures g-l. Here, the frequencies of resistant (*RES*) hosts (light grey) and infective (*INF*) parasites (dark grey) (y-axis) are plotted over time (x-axis). Costs are fixed to  $c_H = 0.05$ ,  $c_P = 0.1$ . The results in finite population size are plotted for  $N_H = N_P = 10,000$ ,  $\mu_{RtoI} = \mu_{ItoI} = \mu_{RtoR} = \mu_{ItoR} = 10^{-5}$ . The site frequency spectra are shown for

712  $\theta_P = \theta_H = 5$  and  $n_H = n_P = 50$ .
